# Supplementary material
Source: PubMed Central journal article supplement (PMC4541035)
Supplement: massspectrometry-4-1-A0039-s001.pdf [file massspectrometry-4-1-A0039-s001.pdf]

## Supporting Information

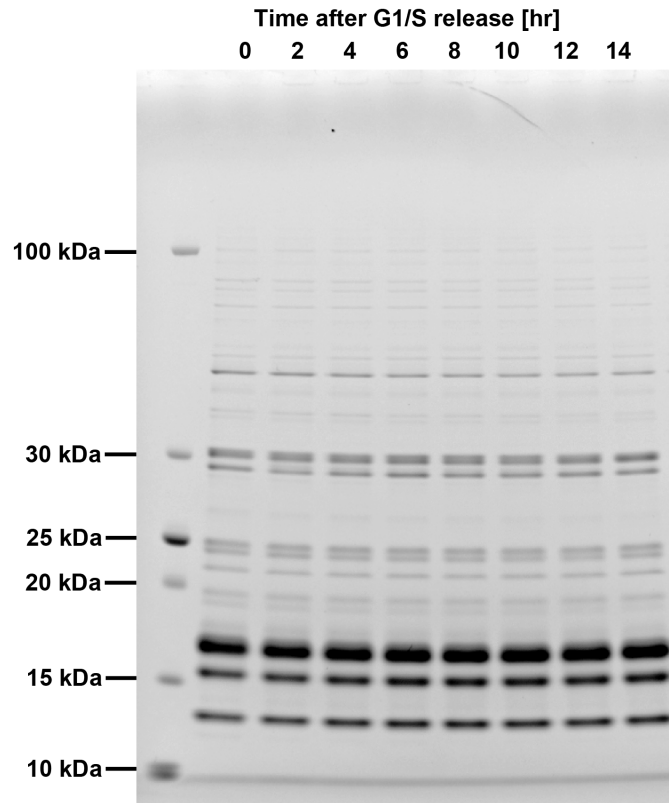

Histone extract 2.5  $\mu$ g/lane, CBB stain.

### Figure S1 Purity of histone extracts

Extracted histone samples were separated by gel electrophoresis, followed by Coomassie Brilliant Blue gel staining.

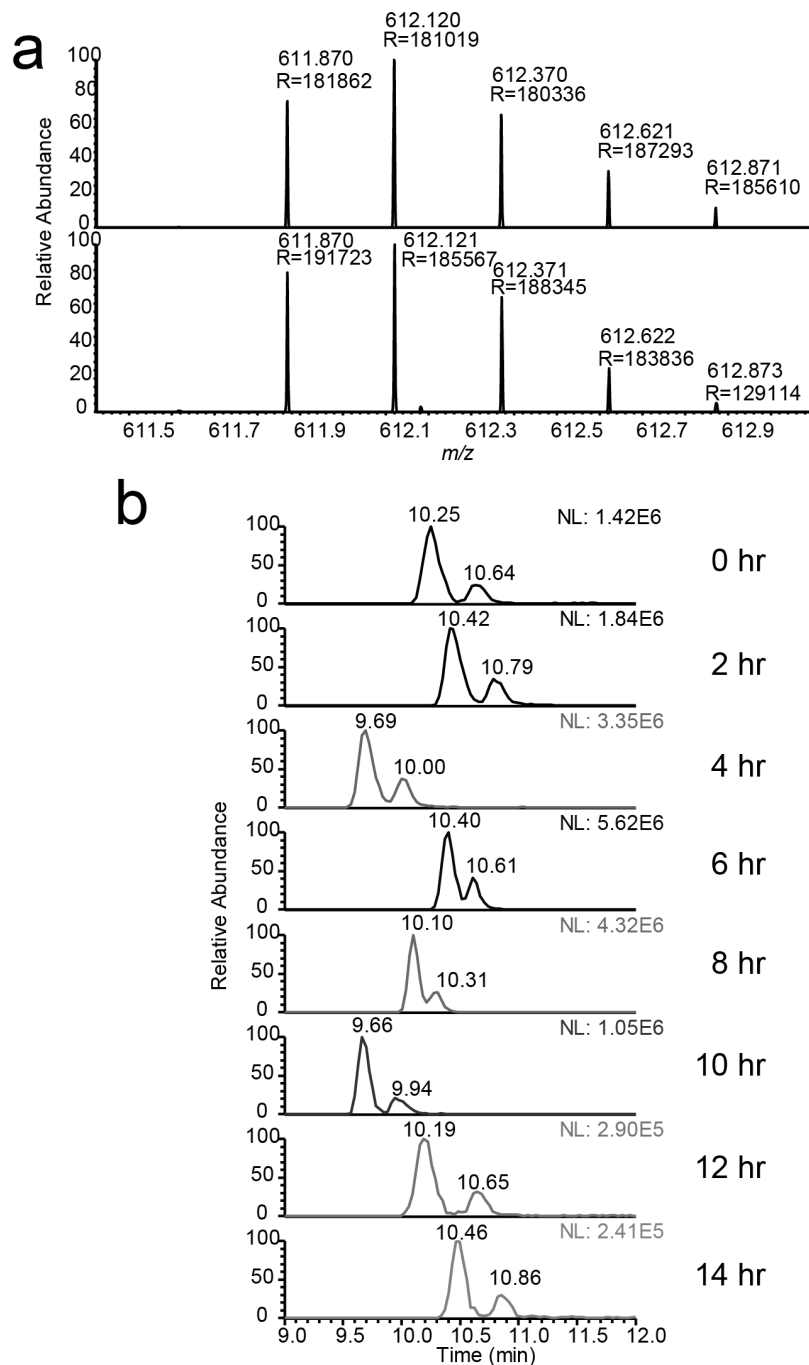

**Figure S2 LC separation of H4 tail with Nac, K12 or K16 ac**

(a) MS spectrum of  $m/z$  611.870 (+4) ion with retention time of 10.25 min (upper panel) and of 10.64 min (lower panel) in data set 3 (0 hr). Expected  $m/z$  value is 611.870.  $\Delta$ ppm is 0ppm. (b) Extracted ion chromatogram of  $m/z$  611.870 for each time point sample in dataset 3, which corresponds to peak 9 & 10 in Fig. S3

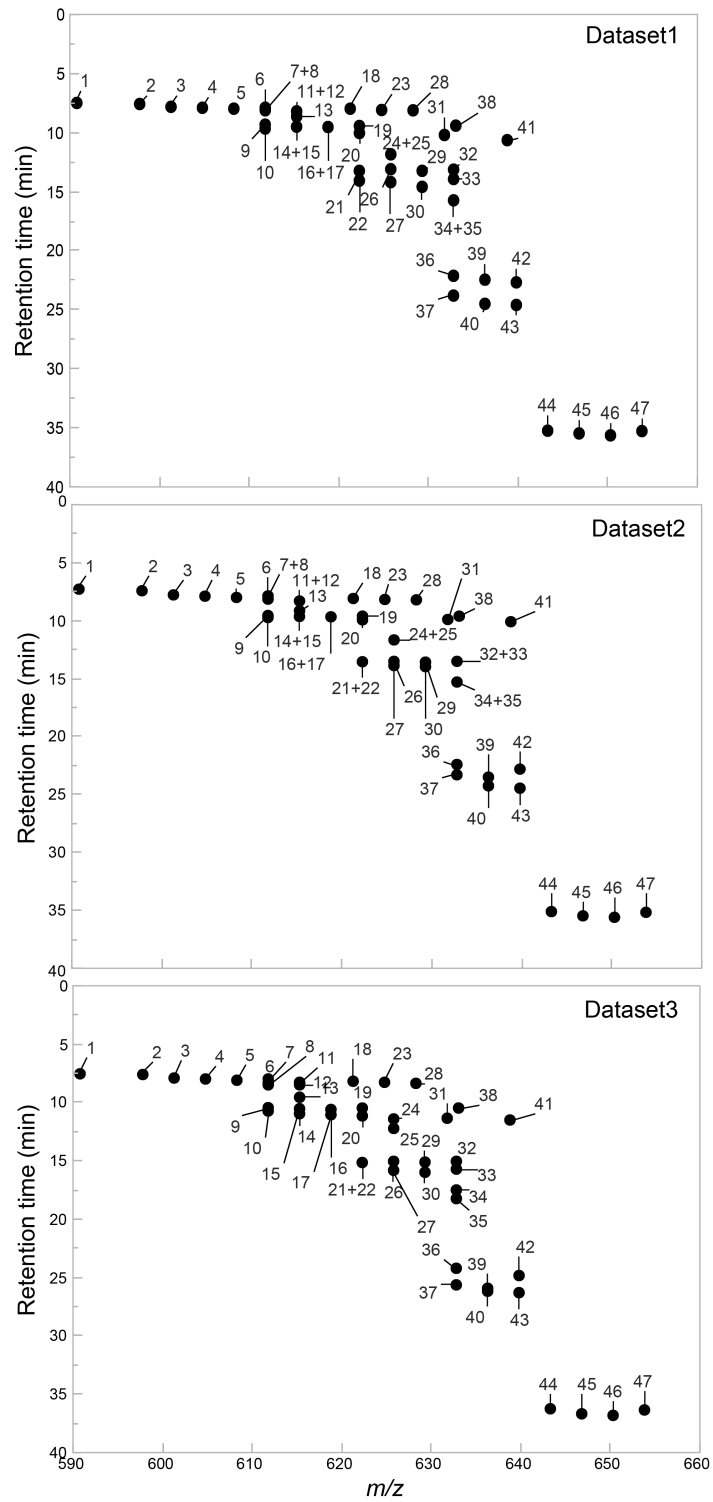

**Figure S3 LC-MS maps for quadruply charged histone H4 tail peptide ions**

Biological triplicates are separately shown.

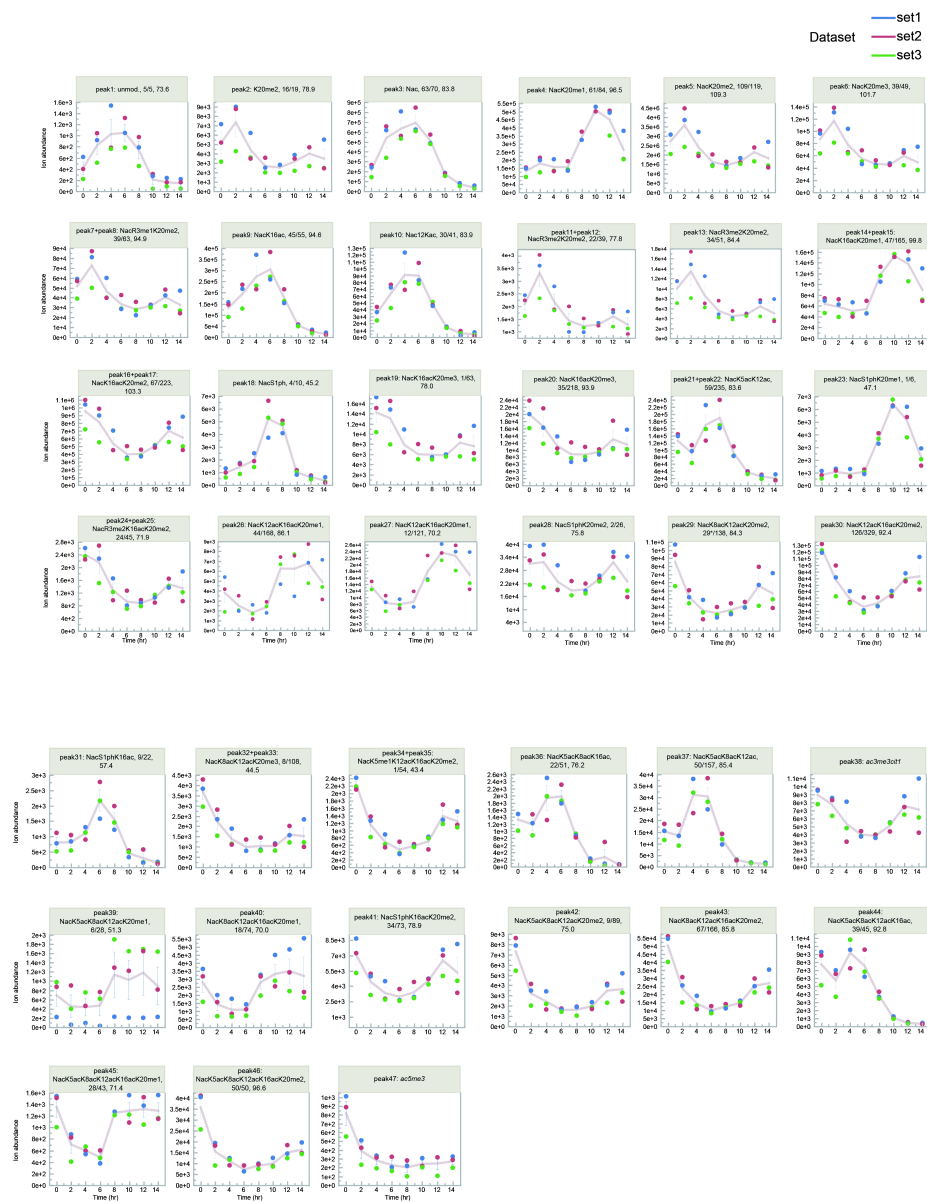

**Figure S4 Complete quantitative data for each H4 tail peaks.**

Temporal dynamics of each peak is shown. Peak No., PTM assignment, number of assigned MS/MS (number of assigned MS/MS spectra to the annotation / number of total MS/MS spectra acquired during the peak window, total of 3 datasets) and best MASCOT ion score are depicted on top of each graph. The peaks which were inseparable in some datasets such as peaks 11 and 12 were indicated as “peak X+Y” en bloc. Underspecified PTM assignment were written in *italics* to show total number of modifications. \*: This includes top 4 assignment that was not listed in table S2.

# Set 1-1

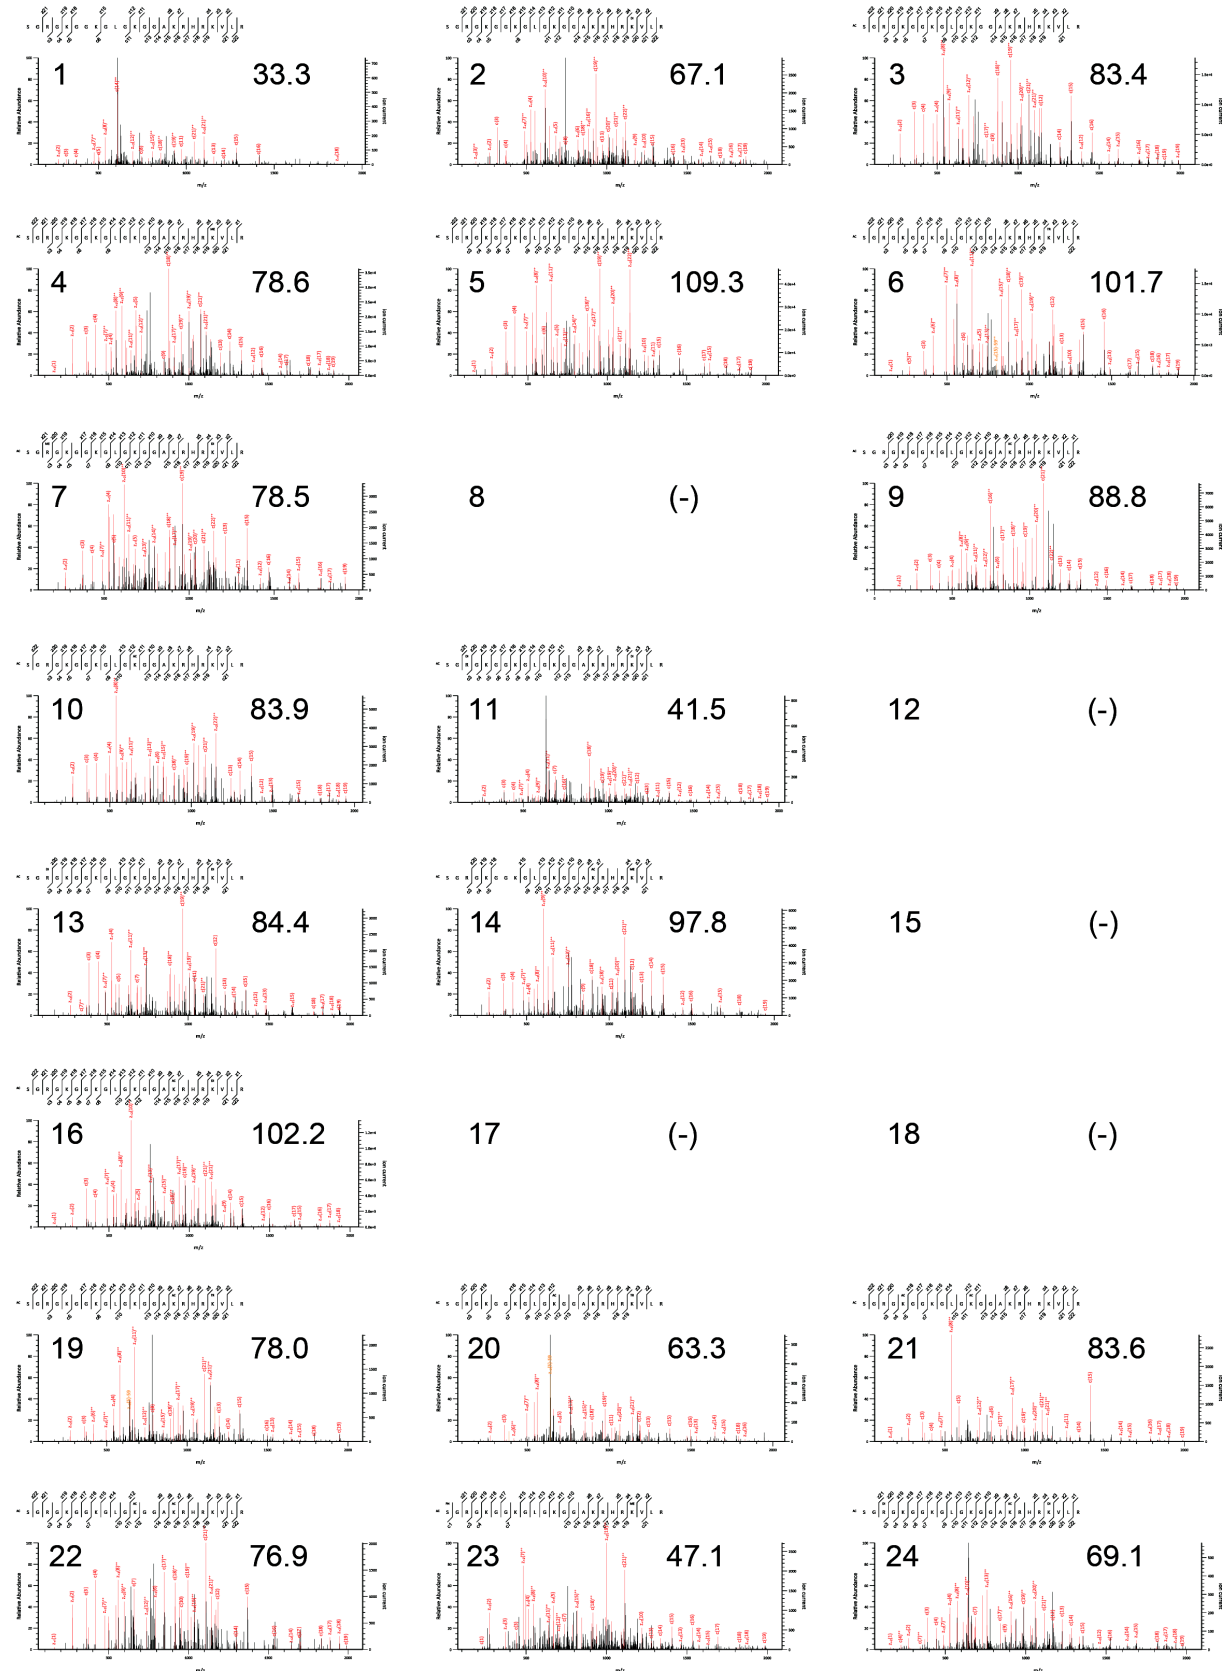

Set 1-2

25 (-)

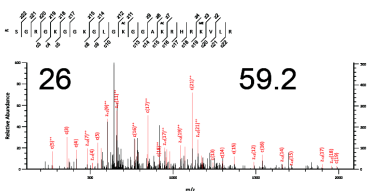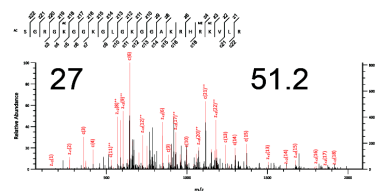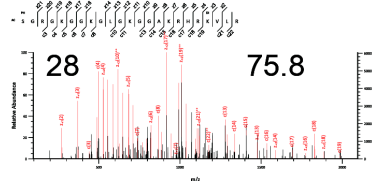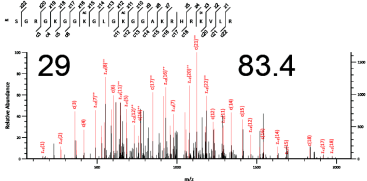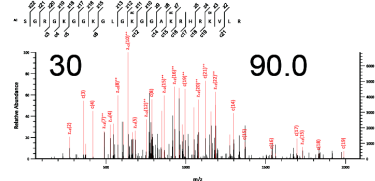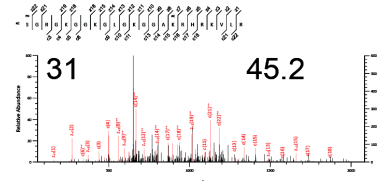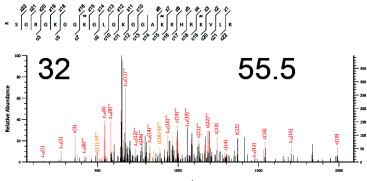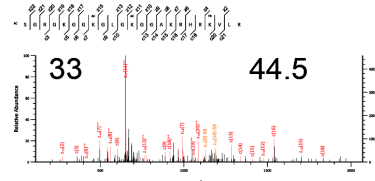

34 (-)

35 (-)

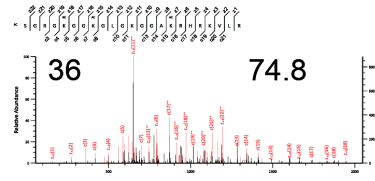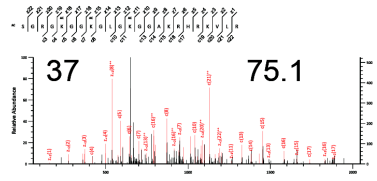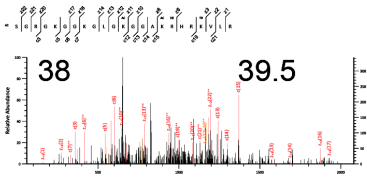

39 (-)

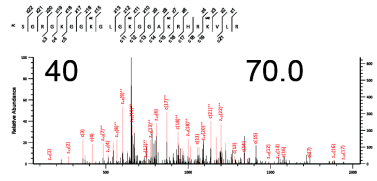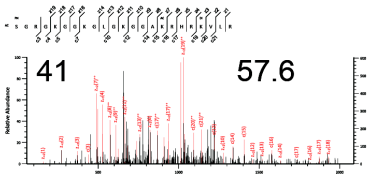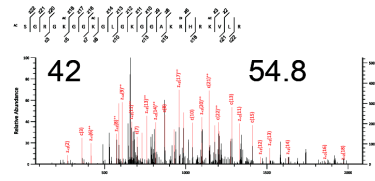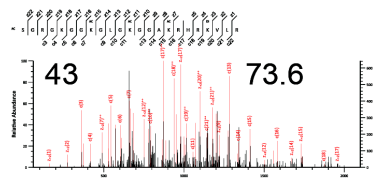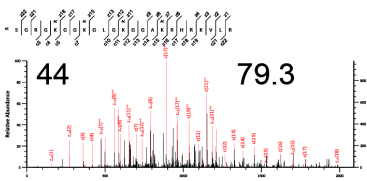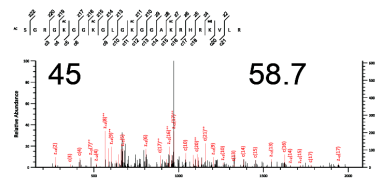

46 96.6

47 (-)

48 (-)

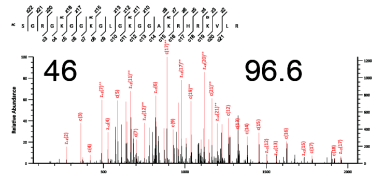

# Set 2-1

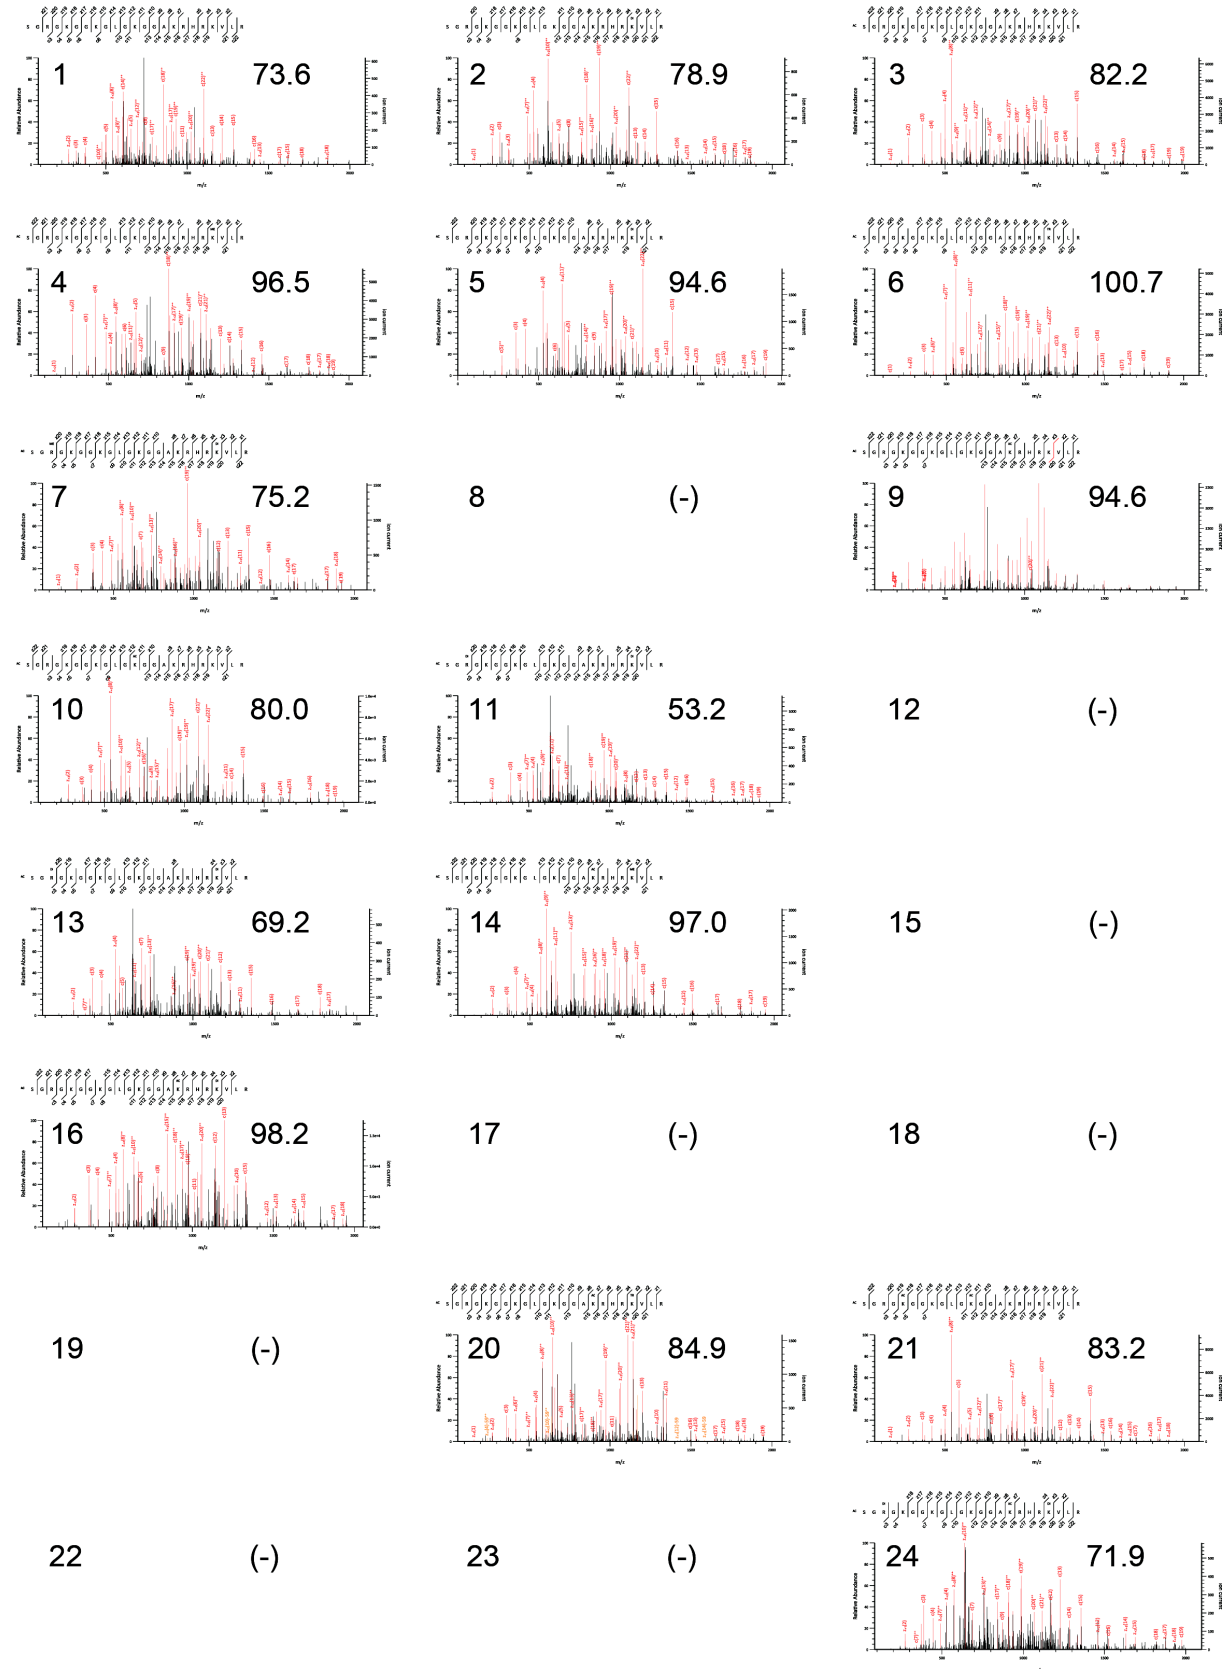

Set 2-2

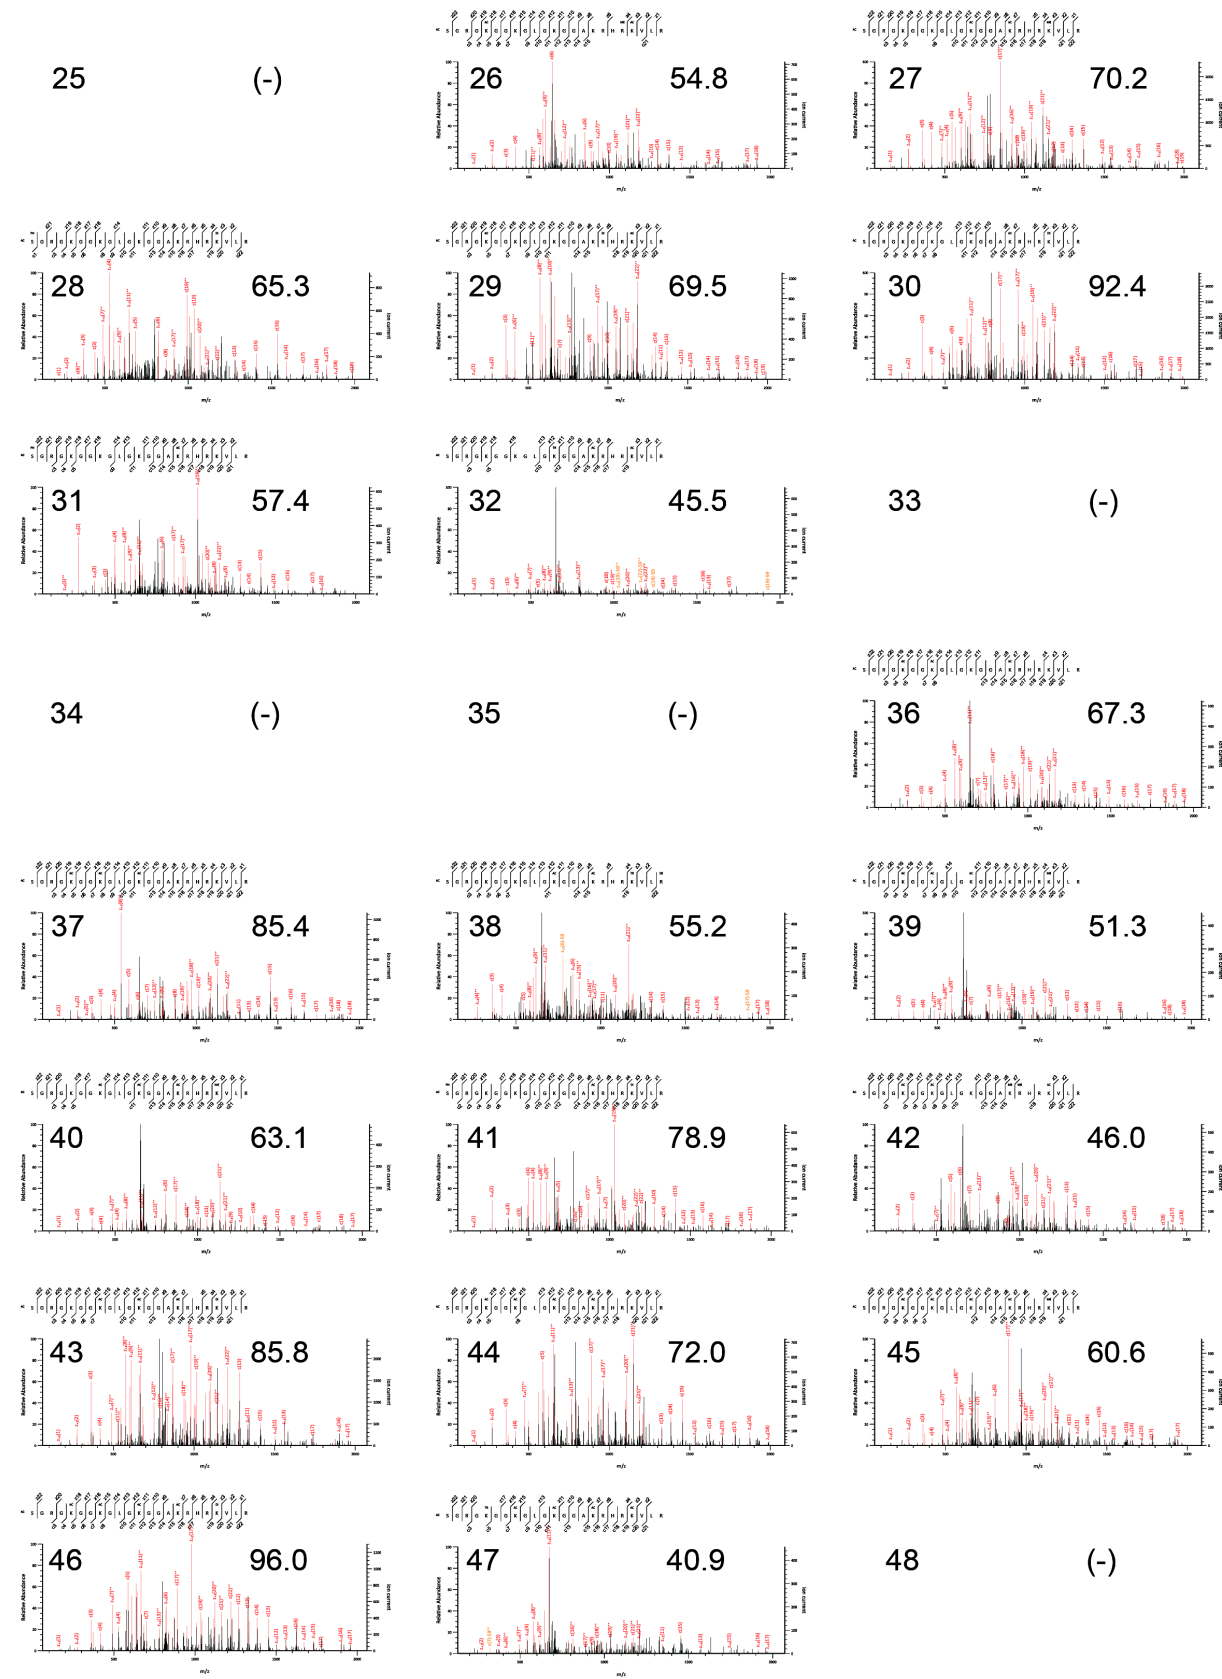



# Set 3-1

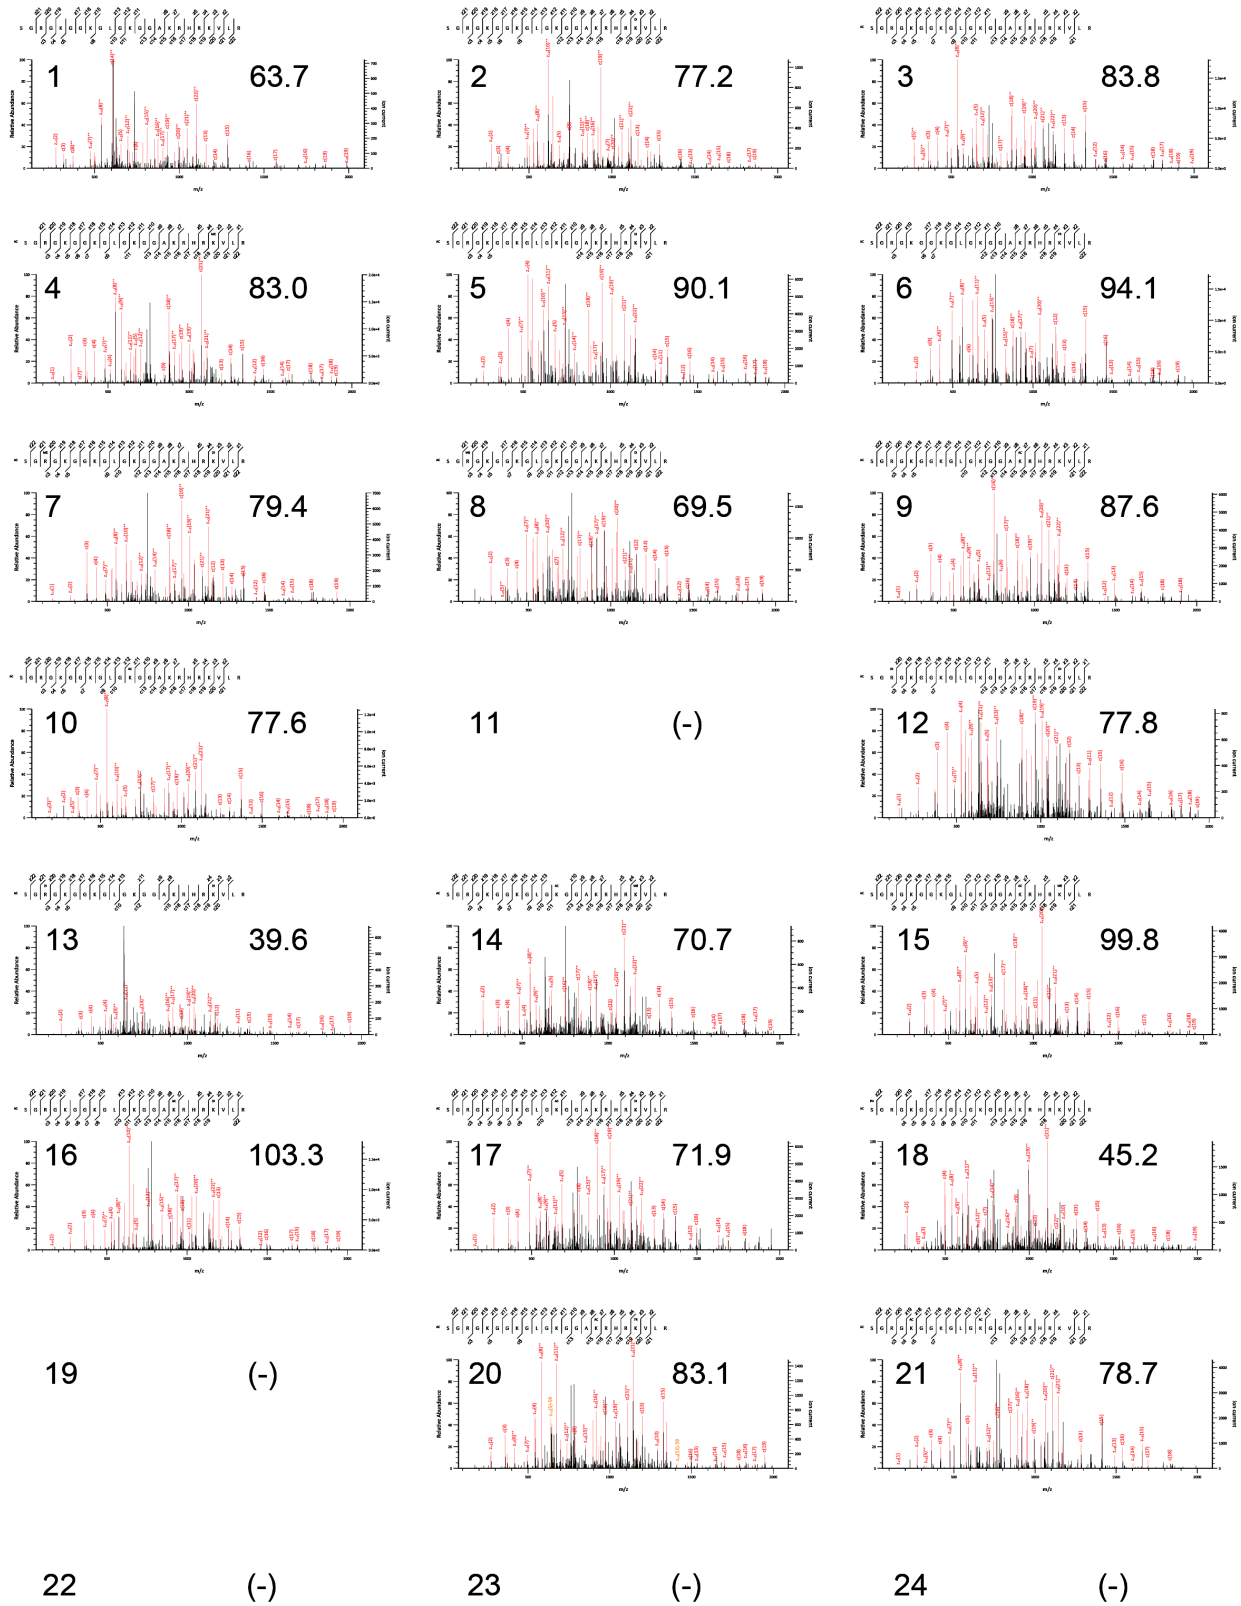

# Set 3-2

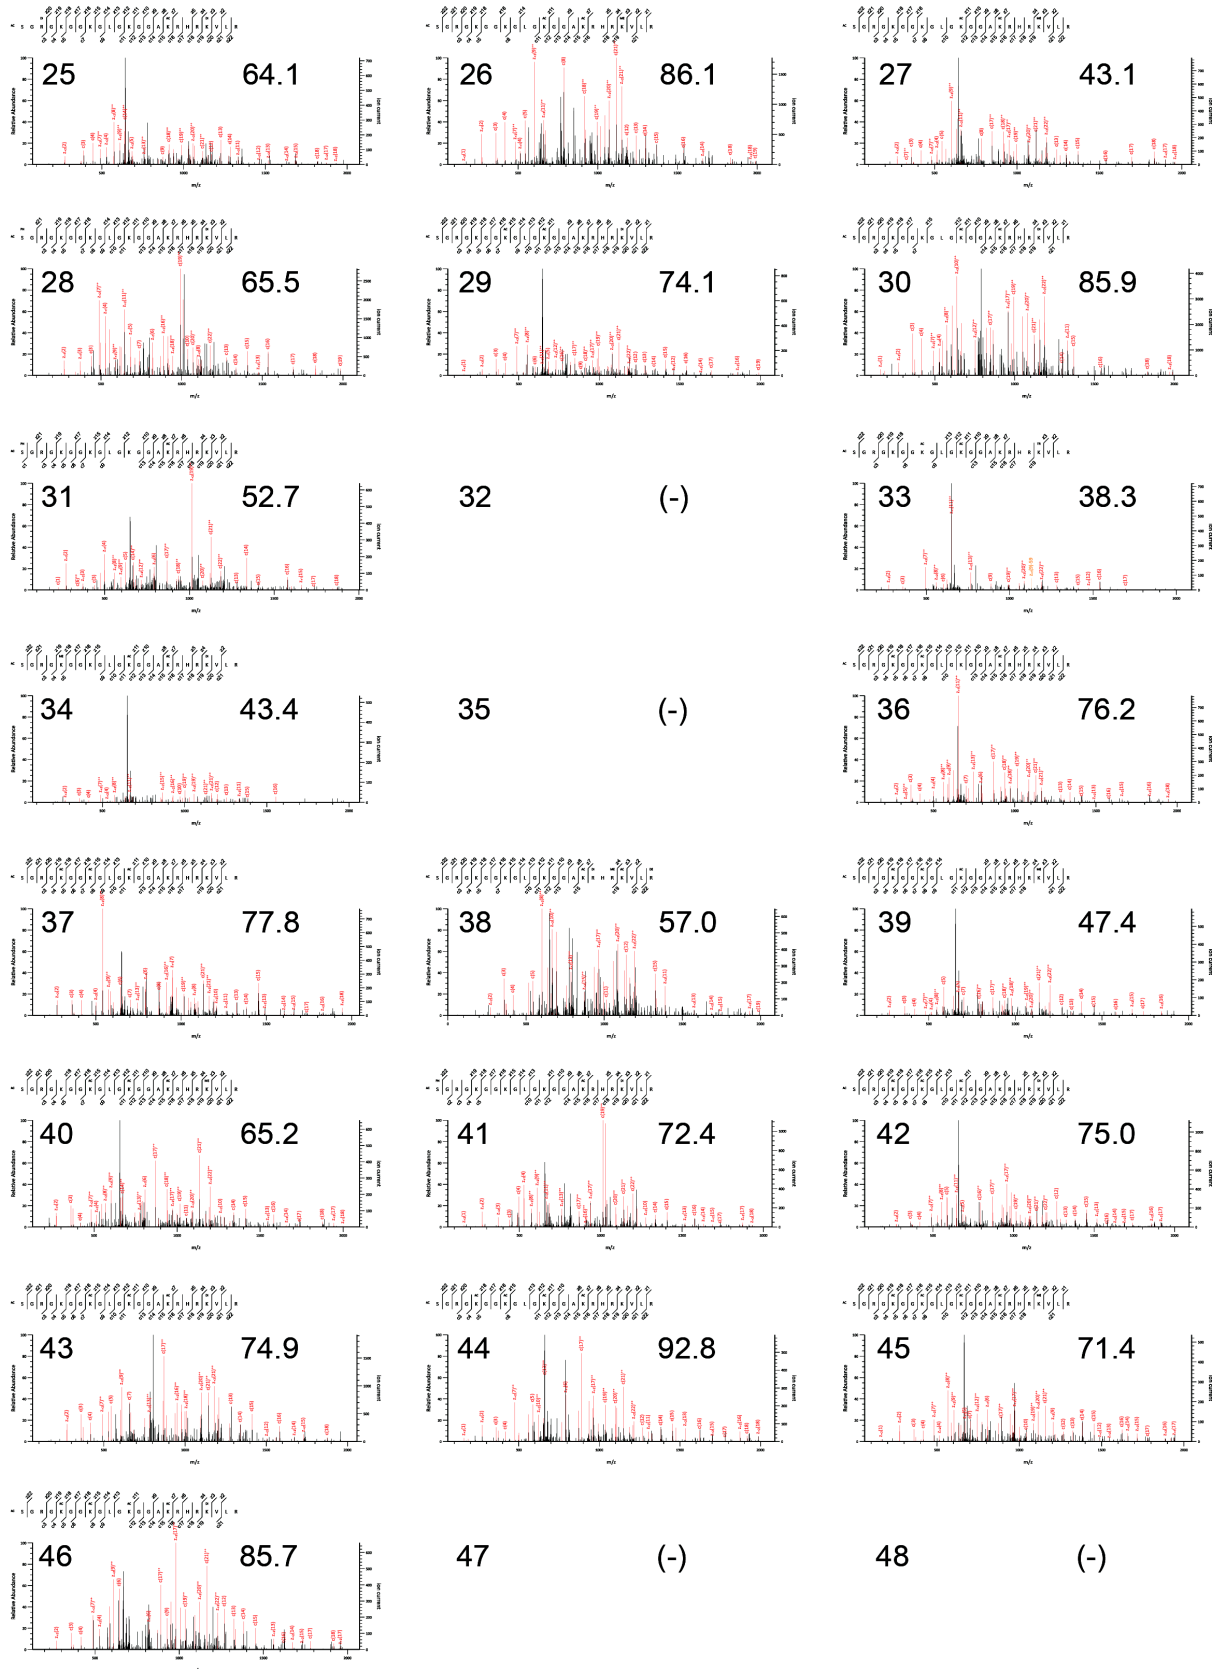

**Figure S5 Best MS/MS spectra for each peaks.**

MS/MS spectra whose MASCOT ion score are best among acquired MS/MS for each peak are shown together with the score.

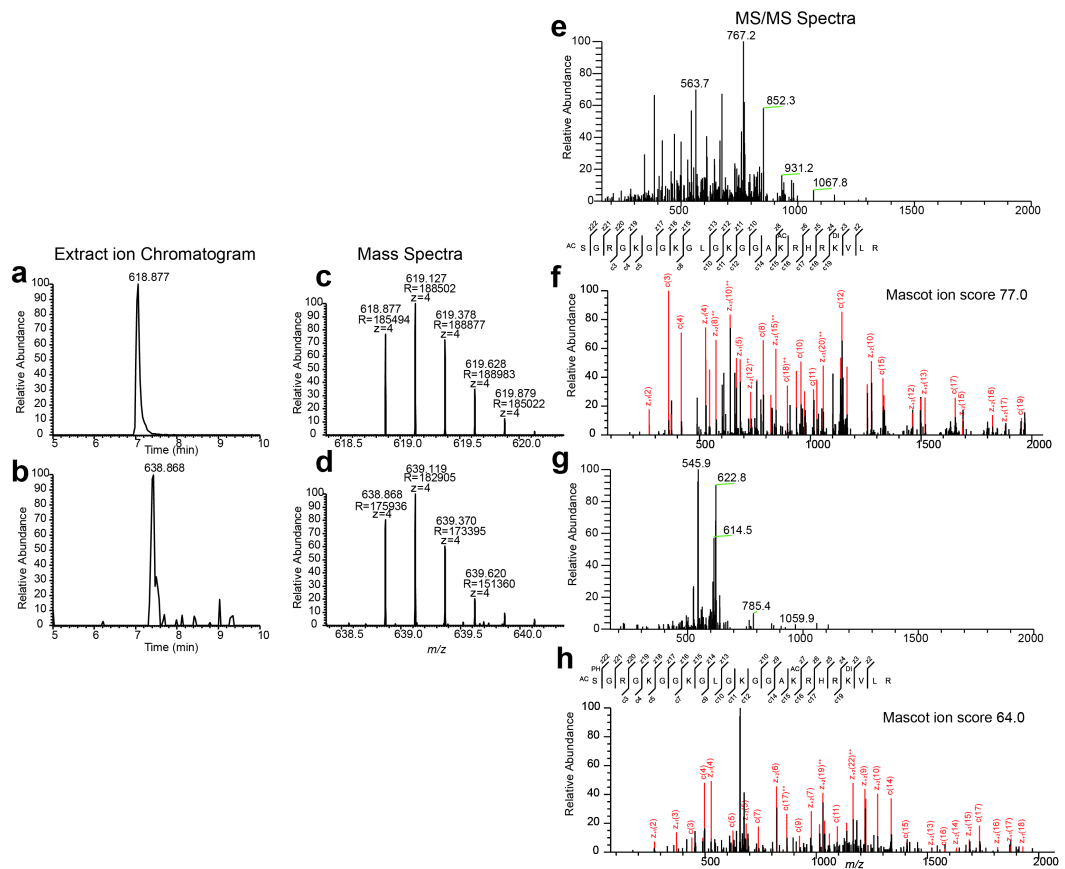

**Figure S6 MS spectra of phosphorylated H4 tail peptides**

Histone-derived peptides were prepared from bovine histone. (a) Exact ion chromatogram for NacK16acK20me2. (b) Exact ion chromatogram for NacS1phK16acK20me2. (c) Mass spectra for NacK16acK20me2. Expected  $m/z$  value of is 618.878,  $\Delta$ ppm is 1.6ppm. (d) Mass spectra for NacS1phK16acK20me2. Expected  $m/z$  value is 638.869,  $\Delta$ ppm is 1.6ppm. (e) CID MS/MS spectra for NacK16acK20me2. (f) ETD MS/MS spectrum for NacK16acK20me2. (g) CID MS/MS spectra for NacS1phK16acK20me2. (h) ETD MS/MS spectrum for NacS1phK16acK20me2.

MASCOT peptide match result for the MS/MS spectra is shown for MS/MS spectrum above the threshold (MASCOT expect score < 0.05).

- a**
- Probe 1:** Dz-SGRGKGGKGLGKGA-DLYDDDDK-G(F<sub>N<sub>3</sub></sub>)-amide  
**Probe 2:** Dz-(pS)GRGKGGKGLGKGA-DLYDDDDK-G(F<sub>N<sub>3</sub></sub>)-amide  
**Probe 3 (G7Bpa):** Ac-SGRGKG(Bpa)KGLGKGGAK(F<sub>N<sub>3</sub></sub>)-amide  
**Probe 4 (G7Bpa):** Ac-(pS)GRGKG(Bpa)KGLGKGGAK(F<sub>N<sub>3</sub></sub>)-amide  
**Probe 5 (G11Bpa):** Ac-SGRGKGGKGL(Bpa)KGGAK(F<sub>N<sub>3</sub></sub>)-amide  
**Probe 6 (G11Bpa):** Ac-(pS)GRGKGGKGL(Bpa)KGGAK(F<sub>N<sub>3</sub></sub>)-amide

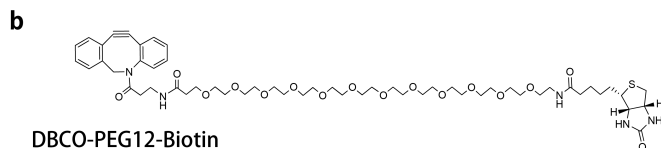

**Figure S7 Design of peptide baits for pull-down experiments**

(a) Full sequences of probes 1–6. Bpa: benzoylphenylalanine, F<sub>N<sub>3</sub></sub>: azidophenylalanine. (b) Structure of dibenzylcyclooctyne–PEG12–Biotin (Jena Bioscience).

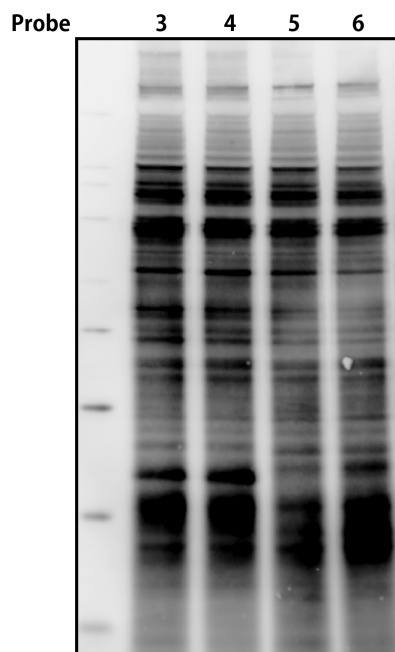

**Figure S8 Landscape of pulled-down proteins by probes 3–6**

Detection of crosslinked products by streptavidin–HRP.

### **Table S1 Complete lists of identified peptides**

Lists generated by Progenesis QI software. MASCOT expect score < 0.05. Raw and normalized abundances of histone H4 and co-purified proteins are shown. Histone H4 C-terminal peptides DVVYALKRQGRTLYGFGG (+3 and +4) used for normalization are shown in bold blue font.

**See Table S1.xlsx**

**Table S2 MS/MS spectrum assignment for each separated peak**

Top 1 to 3 assignment and the number of MS/MS spectra assigned are listed for each peaks.

Set 1

| PTM        | m/z     | Peak No. | total MS/M | assignment MS/M | top hit                      | 2nd hit                 | 3d hit                                         | unassign |
|------------|---------|----------|------------|-----------------|------------------------------|-------------------------|------------------------------------------------|----------|
| -          | 590.864 | 1        |            |                 | unmod                        | -                       | -                                              |          |
|            |         |          | 1          | 1               | 1                            |                         |                                                | 0        |
| me2        | 597.872 | 2        |            |                 | K20me2                       | R17me1K20me1            |                                                |          |
|            |         |          | 9          | 9               | 8                            | 1                       |                                                | 0        |
| ac         | 601.368 | 3        |            |                 | Nac                          | -                       | -                                              |          |
|            |         |          | 23         | 22              | 22                           | -                       | -                                              | 1        |
| ac1me1     | 604.871 | 4        |            |                 | NacK20me1                    | -                       | -                                              |          |
|            |         |          | 27         | 21              | 21                           | -                       | -                                              | 6        |
| ac1me2     | 608.376 | 5        |            |                 | NacK20me2                    | NacR17me2               | NacR19.K20me1                                  |          |
|            |         |          | 42         | 42              | 37                           | 4                       | 1                                              | 0        |
| ac1me3     | 611.877 | 6        |            |                 | NacK20me3                    | -                       | -                                              |          |
|            |         |          | 16         | 14              | 14                           | -                       | -                                              | 2        |
|            | 611.878 | 7        |            |                 | NacR3me1K20me2               | NacK20me3               | NacR3me2K20me1 or NacK5me1K20me2               |          |
|            |         |          | 8          | 15              | 10                           | 2                       | 1                                              | 1        |
| ac2        | 611.870 | 9        |            |                 | NacK16ac                     | NacK12ac                | NacK8ac                                        |          |
|            |         |          | 17         | 17              | 15                           | 1                       |                                                | 0        |
|            | 611.870 | 10       |            |                 | NacK12ac                     | NacK16ac                | -                                              |          |
|            |         |          | 13         | 11              | 10                           | 1                       | -                                              | 2        |
| ac1me4     | 615.382 | 11       |            |                 | NacR3me2K20me2               | -                       | -                                              |          |
|            |         |          | 12         | 10              | 3                            | -                       | -                                              | 7        |
|            | 615.382 | 13       |            |                 | NacR3me2K20me2               | -                       | -                                              |          |
|            |         |          | 20         | 16              | 16                           | -                       | -                                              | 4        |
| ac2me1     | 615.374 | 14       |            |                 | NacK16acK20me1               | NacK12acK20me1          | -                                              |          |
|            |         |          | 15         | 53              | 16                           | 14                      | -                                              | 23       |
| ac2me2     | 618.878 | 16       |            |                 | NacK16acK20me2               | NacK12acK20me2          | NacK8acK20me2 or NacK16acR23me2                |          |
|            |         |          | 17         | 59              | 29                           | 17                      | 2                                              | 9        |
| ac1p1      | 621.357 | 18       |            |                 | NacS1phos                    | -                       | -                                              |          |
|            |         |          | 3          | 0               | -                            | -                       | -                                              | 3        |
| ac2me3     | 622.380 | 19       |            |                 | NacK16acK20me3               | -                       | -                                              |          |
|            |         |          | 18         | 1               | 1                            | -                       | -                                              | 17       |
|            | 622.381 | 20       |            |                 | NacK12acK20me3               | NacK16acK20me3          | NacR3me1K16acK20me2                            |          |
|            |         |          | 78         | 40              | 11                           | 8                       | 8                                              | 38       |
| ac3        | 622.372 | 21       |            |                 | NacK5acK12ac                 | NacK5acK16ac            | NacK5acK8ac                                    |          |
|            |         |          | 52         | 39              | 17                           | 12                      | 3                                              | 13       |
|            | 622.372 | 22       |            |                 | NacK12acK16ac                | NacK5acK12ac            | NacK8acK16ac                                   |          |
|            |         |          | 34         | 17              | 14                           | 2                       | 1                                              | 17       |
| ac1me1p1   | 624.862 | 23       |            |                 | NacS1phosK20me1              | -                       | -                                              |          |
|            |         |          | 2          | 2               | 1                            | -                       | -                                              | 0        |
| ac2me4     | 625.885 | 24       |            |                 | NacR3me2K16acK20me2          | -                       | -                                              |          |
|            |         |          | 25         | 20              | 10                           | -                       | -                                              | 10       |
| ac3me1     | 625.876 | 26       |            |                 | NacK12acK16acK20me1          | NacK8K12acK20me1        | NacK5K8K20me1                                  |          |
|            |         |          | 71         | 34              | 20                           | 9                       | 4                                              | 37       |
|            | 625.876 | 27       |            |                 | NacK5acR19meK20ac            | NacK12acK16acK20me1     | -                                              |          |
|            |         |          | 26         | 3               | 2                            | 1                       | -                                              | 23       |
| ac1me2p1   | 628.366 | 28       |            |                 | NacS1phosK20me2              | -                       | -                                              |          |
|            |         |          | 4          | 4               | 4                            | -                       | -                                              | 0        |
| ac3me2     | 629.380 | 29       |            |                 | NacK8acK12acK20me2           | NacK5acK8acK20me2       | NacK12acK16acK20me2                            |          |
|            |         |          | 48         | 38              | 11                           | 9                       | 6                                              | 10       |
|            | 629.380 | 30       |            |                 | NacK12acK16acK20me2          | NacK8acK12acK20me2      | NacK12acK16acR19me2                            |          |
|            |         |          | 88         | 57              | 46                           | 7                       | 2                                              | 31       |
| ac2p1      | 631.861 | 31       |            |                 | NacS1phosK16ac               | -                       | -                                              |          |
|            |         |          | 6          | 3               | 3                            | -                       | -                                              | 3        |
| ac3me3     | 632.884 | 32       |            |                 | NacK8me3K16acK20ac           | NacR3me3K5me2K16acK20ac | -                                              |          |
|            |         |          | 8          | 2               | 1                            | 1                       | -                                              | 6        |
|            | 632.884 | 33       |            |                 | NacK8acK12acK20me3           | NacK12me3K16acK20ac     | NacK12acK16acK20me3 or NacK12.16acR17me2R19me1 |          |
|            |         |          | 28         | 7               | 3                            | 2                       | 1                                              | 21       |
|            | 632.884 | 34       |            |                 | -                            | -                       | -                                              |          |
|            |         |          | 35         | 18              | -                            | -                       | -                                              | 18       |
| ac4        | 632.874 | 36       |            |                 | NacK5acK8acK16ac             | -                       | -                                              |          |
|            |         |          | 13         | 10              | 10                           | -                       | -                                              | 3        |
|            | 632.875 | 37       |            |                 | NacK5acK8acK12ac             | NacK5acK12acK16ac       | NacK8acK12acK16ac                              |          |
|            |         |          | 60         | 45              | 17                           | 11                      | 11                                             | 15       |
| ac3me3cit1 | 633.132 | 38       |            |                 | NacK12.16acR17citK20me3      | NacK12me3K16.20acR19cit | NacK12.16acR17me1R19citK20me2                  |          |
|            |         |          | 33         | 3               | 1                            | 1                       | 1                                              | 30       |
| ac4me1     | 636.378 | 39       |            |                 | -                            | -                       | -                                              |          |
|            |         |          | 2          | 0               | -                            | -                       | -                                              | 2        |
|            | 636.379 | 40       |            |                 | NacK8acK12acK16acK20me1      | NacK5acK8acK12acK20me1  | NacK5.8.12acR17me1                             |          |
|            |         |          | 33         | 13              | 8                            | 4                       | 1                                              | 20       |
| ac2me2p1   | 638.869 | 41       |            |                 | NacS1phosK16acK20me2         | -                       | -                                              |          |
|            |         |          | 27         | 10              | 10                           | -                       | -                                              | 17       |
| ac4me2     | 639.882 | 42       |            |                 | NacK5acK8acK16me1R17me1K20ac | NacK5acK8acR17me2K20ac  | NacK5acK8acK16me1R19me1K20ac                   |          |
|            |         |          | 35         | 9               | 3                            | 3                       | 1                                              | 26       |
|            | 639.883 | 43       |            |                 | NacK8acK12acK16acK20me2      | NacK5acK8acK12acK20me2  | NacK5acK8acK12acR17me2                         |          |
|            |         |          | 59         | 45              | 24                           | 18                      | 1                                              | 14       |
| ac5        | 643.377 | 44       |            |                 | NacK5acK8acK12acK16ac        | -                       | -                                              |          |
|            |         |          | 16         | 13              | 13                           | -                       | -                                              | 3        |
| ac5me1     | 646.881 | 45       |            |                 | NacK5acK8acK12acK16acK20me1  | -                       | -                                              |          |
|            |         |          | 12         | 10              | 10                           | -                       | -                                              | 2        |
| ac5me2     | 650.385 | 46       |            |                 | NacK5acK8acK12acK16acK20me2  | -                       | -                                              |          |
|            |         |          | 15         | 15              | 15                           | -                       | -                                              | 0        |
| ac5me3     | 653.889 | 47       |            |                 | -                            | -                       | -                                              |          |
|            |         |          | 4          | 0               | -                            | -                       | -                                              | 4        |

## Set 2

| PTM        | m/z     | Peak N | total MS/N | assigned MS/N | top hit                      | 2nd hit                                   | 3d hit                 | unassign |
|------------|---------|--------|------------|---------------|------------------------------|-------------------------------------------|------------------------|----------|
| -          | 590.864 | 1      |            |               | unmod                        | -                                         | -                      |          |
|            |         |        | 2          | 2             | 2                            | -                                         | -                      | 0        |
| me2        | 597.872 | 2      |            |               | K20me2                       | R19me2                                    | -                      |          |
|            |         |        | 4          | 4             | 3                            | 1                                         | -                      | 0        |
| ac         | 601.368 | 3      |            |               | Nac                          | -                                         | -                      |          |
|            |         |        | 22         | 20            | 20                           | -                                         | -                      | 2        |
| ac1,me1    | 604.871 | 4      |            |               | NacK20me1                    | NacR19me1                                 | -                      |          |
|            |         |        | 29         | 21            | 20                           | 1                                         | -                      | 8        |
| ac1,me2    | 608.376 | 5      |            |               | NacK20me2                    | NacR17me2 or NacR19me1K20me1 or NacR23me2 | -                      |          |
|            |         |        | 38         | 38            | 35                           | 1                                         | -                      | 0        |
| ac1,me3    | 611.877 | 6      |            |               | NacK20me3                    | -                                         | -                      |          |
|            |         |        | 17         | 10            | 10                           | -                                         | -                      | 7        |
|            | 611.878 | 7      |            |               | NacR3me1K20me2               | NacK20me3                                 | NacR3me2K20me1         |          |
|            |         |        | 8          | 21            | 13                           | 6                                         | 1                      | 1        |
| ac2        | 611.870 | 9      |            |               | NacK16ac                     | NacK12ac                                  | NacK20ac               |          |
|            |         |        | 18         | 18            | 15                           | 2                                         | 1                      | 0        |
|            | 611.870 | 10     |            |               | NacK12ac                     | NacK8ac                                   | -                      |          |
|            |         |        | 9          | 7             | 6                            | 1                                         | -                      | 2        |
| ac1me4     | 615.382 | 11     |            |               | NacR3me2K20me2               | -                                         | -                      |          |
|            |         |        | 12         | 10            | 6                            | -                                         | -                      | 4        |
|            | 615.382 | 13     |            |               | NacR3me2K20me2               | -                                         | -                      |          |
|            |         |        | 19         | 15            | 15                           | -                                         | -                      | 4        |
| ac2me1     | 615.374 | 14     |            |               | NacK16acK20me1               | NacK12acK20me1                            | NacK16acR19me1         |          |
|            |         |        | 15         | 53            | 15                           | 9                                         | 1                      | 28       |
| ac2me2     | 618.878 | 16     |            |               | NacK16acK20me2               | NacK12acK20me2                            | NacK8acK20me2          |          |
|            |         |        | 17         | 88            | 24                           | 17                                        | 3                      | 40       |
| ac1p1      | 621.357 | 18     |            |               | -                            | -                                         | -                      |          |
|            |         |        | 3          | 0             | 0                            | -                                         | -                      | 3        |
| ac2me3     | 622.380 | 19     |            |               | -                            | -                                         | -                      |          |
|            |         |        | 23         | 0             | -                            | -                                         | -                      | 23       |
|            | 622.381 | 20     |            |               | NacK16acK20me3               | NacR3meK16acK20me2                        | NacK12acK20me3         |          |
|            |         |        | 66         | 39            | 12                           | 12                                        | 5                      | 27       |
| ac3        | 622.372 | 21     |            |               | NacK5acK12ac                 | NacK5acK16ac                              | NacK12acK16ac          |          |
|            |         |        | 22         | 66            | 17                           | 13                                        | 12                     | 18       |
| ac1me1p1   | 624.862 | 23     |            |               | NacS1phosK20me1              | -                                         | -                      |          |
|            |         |        | 4          | 0             | 0                            | -                                         | -                      | 4        |
| ac2me4     | 625.885 | 24     |            |               | NacR3me2K16acK20me2          | -                                         | -                      |          |
|            |         |        | 25         | 12            | 7                            | -                                         | -                      | 5        |
| ac3me1     | 625.876 | 26     |            |               | NacK5acR19me1K20ac           | NacK8acK12acK20me1                        | NacK5acR17me1K20ac     |          |
|            |         |        | 24         | 10            | 5                            | 2                                         | 2                      | 14       |
|            | 625.876 | 27     |            |               | NacK12acK16acK20me1          | NacK8acK12acK20me1                        | NacK5acK8acK20me1      |          |
|            |         |        | 62         | 19            | 10                           | 6                                         | 2                      | 43       |
| ac1me2p1   | 628.366 | 28     |            |               | NacS1phosK20me2              | -                                         | -                      |          |
|            |         |        | 2          | 2             | 2                            | -                                         | -                      | 0        |
| ac3me2     | 629.380 | 29     |            |               | NacK5acR17me2K20ac           | NacK12K16acK20me2                         | NacK5acK8acK20me2      |          |
|            |         |        | 39         | 26            | 9                            | 5                                         | 4                      | 13       |
|            | 629.380 | 30     |            |               | NacK12acK16acK20me2          | NacK8acK12acK20me2                        | NacK5acK8acK20me2      |          |
|            |         |        | 126        | 48            | 37                           | 7                                         | 3                      | 78       |
| ac2p1      | 631.861 | 31     |            |               | NacS1phosK16ac               | -                                         | -                      |          |
|            |         |        | 5          | 3             | 3                            | -                                         | -                      | 2        |
| ac3me3     | 632.884 | 32     |            |               | NacK12me3K16acK20ac          | NacK8acK12acK20me3                        | -                      |          |
|            |         |        | 33         | 28            | 9                            | 2                                         | -                      | 19       |
|            | 632.884 | 34     |            |               | -                            | -                                         | -                      |          |
|            |         |        | 35         | 19            | 0                            | -                                         | -                      | 19       |
| ac4        | 632.874 | 36     |            |               | NacK5acK8acK16ac             | -                                         | -                      |          |
|            |         |        | 19         | 5             | 5                            | -                                         | -                      | 14       |
|            | 632.875 | 37     |            |               | NacK5acK8acK12ac             | NacK8acK12acK16ac                         | NacK5acK12acK16ac      |          |
|            |         |        | 54         | 47            | 19                           | 10                                        | 10                     | 7        |
| ac3me3cit1 | 633.132 | 38     |            |               | NacK12K16acK20me3R23cit      | NacK16acR17me2R19me1K20acR23cit           | -                      |          |
|            |         |        | 31         | 6             | 2                            | 2                                         | -                      | 25       |
| ac4me1     | 636.378 | 39     |            |               | NacK5acK8acK12acK20me1       | NacK5acK8acK12acR17me1                    | -                      |          |
|            |         |        | 14         | 5             | 4                            | 1                                         | -                      | 9        |
|            | 636.379 | 40     |            |               | NacK8acK12acK16acK20me1      | -                                         | -                      |          |
|            |         |        | 28         | 5             | 5                            | -                                         | -                      | 23       |
| ac2me2p1   | 638.869 | 41     |            |               | NacS1phosK16acK20me2         | -                                         | -                      |          |
|            |         |        | 23         | 14            | 14                           | -                                         | -                      | 9        |
| ac4me2     | 639.882 | 42     |            |               | NacK5acK8acK16me1R17me1K20ac | NacK5acK8acK12acK20me2                    | NacK5acK8acR17me2K20ac |          |
|            |         |        | 31         | 15            | 8                            | 6                                         | 1                      | 16       |
|            | 639.883 | 43     |            |               | NacK8acK12acK16acK20me2      | NacK5acK8acK12acK20me2                    | -                      |          |
|            |         |        | 67         | 43            | 27                           | 13                                        | -                      | 24       |
| ac5        | 643.377 | 44     |            |               | NacK5acK8acK12acK16ac        | -                                         | -                      |          |
|            |         |        | 13         | 12            | 12                           | -                                         | -                      | 1        |
| ac5me1     | 646.881 | 45     |            |               | NacK5acK8acK12acK16acK20me1  | NacK5acK8acK12acK16acR19me1               | -                      |          |
|            |         |        | 18         | 10            | 9                            | 1                                         | -                      | 8        |
| ac5me2     | 650.385 | 46     |            |               | NacK5acK8acK12acK16acK20me2  | -                                         | -                      |          |
|            |         |        | 17         | 17            | 17                           | -                                         | -                      | 0        |
| ac5me3     | 653.889 | 47     |            |               | NacK5me3K8acK12acK16acK20ac  | NacK5acK8me3K12acK16acK20ac               | -                      |          |
|            |         |        | 3          | 2             | 1                            | 1                                         | -                      | 1        |



| PTM          | m/z     | Peak | total MS/1 | assigned MS/1 | top hit                         | 2nd hit                      | 3d hit                                             | unassign |
|--------------|---------|------|------------|---------------|---------------------------------|------------------------------|----------------------------------------------------|----------|
| -            | 590.864 | 1    |            |               | unmod                           | -                            | -                                                  |          |
|              |         |      | 2          | 2             | 2                               | -                            | -                                                  |          |
| me2          | 597.872 | 2    |            |               | K20me2                          | R17me1R19me1                 | -                                                  | 0        |
|              |         |      | 6          | 6             | 5                               | 1                            | -                                                  |          |
| ac           | 601.368 | 3    |            |               | Nac                             | -                            | -                                                  |          |
|              |         |      | 25         | 21            | 21                              | -                            | -                                                  | 4        |
| ac1.me1      | 604.871 | 4    |            |               | NacK20me1                       | NacR3me1                     | -                                                  |          |
|              |         |      | 28         | 20            | 20                              | 1                            | -                                                  | 8        |
| ac1.me2      | 608.376 | 5    |            |               | NacK20me2                       | NacR17me2 or NacR19me1K20me1 | -                                                  |          |
|              |         |      | 39         | 39            | 37                              | 1                            | -                                                  | 0        |
| ac1.me3      | 611.877 | 6    |            |               | NacK20me3                       | -                            | -                                                  |          |
|              |         |      | 16         | 15            | 15                              | -                            | -                                                  | 1        |
|              | 611.878 | 7    |            |               | NacR3me1K20me2                  | -                            | -                                                  |          |
|              |         |      | 10         | 10            | 10                              | -                            | -                                                  | 0        |
|              | 611.878 | 8    |            |               | NacR3me1K20me2                  | -                            | -                                                  |          |
|              |         |      | 17         | 6             | 6                               | -                            | -                                                  | 11       |
| ac2          | 611.870 | 9    |            |               | NacK16ac                        | NacK20ac                     | -                                                  |          |
|              |         |      | 20         | 16            | 15                              | 1                            | -                                                  | 4        |
|              | 611.870 | 10   |            |               | NacK12ac                        | -                            | -                                                  |          |
|              |         |      | 19         | 14            | 14                              | -                            | -                                                  | 5        |
| ac1.me4      | 615.382 | 11   |            |               | -                               | -                            | -                                                  |          |
|              |         |      | 0          | 0             | -                               | -                            | -                                                  | 0        |
|              | 615.382 | 12   |            |               | NacR3me2K20me2                  | -                            | -                                                  |          |
|              |         |      | 19         | 13            | 13                              | -                            | -                                                  | 6        |
|              | 615.382 | 13   |            |               | NacR3me2K20me2                  | NacR3me2R19me1K20me1         | -                                                  |          |
|              |         |      | 12         | 4             | 3                               | 1                            | -                                                  | 8        |
| ac2.me1      | 615.374 | 14   |            |               | NacK12acK20me1                  | NacK8acK20me1                | NacK12acR19me1 or NacK16acK20me1 or NacR17me1K20ac |          |
|              |         |      | 34         | 16            | 9                               | 4                            | 1                                                  | 18       |
|              | 615.374 | 15   |            |               | NacK16acK20me1                  | -                            | -                                                  |          |
|              |         |      | 25         | 16            | 16                              | -                            | -                                                  | 9        |
| ac2.me2      | 618.878 | 16   |            |               | NacK16acK20me2                  | NacK8acK20me2                | NacR17me1R19me1K20ac or NacK16acR18me1K20me1       |          |
|              |         |      | 34         | 18            | 14                              | 2                            | 1                                                  | 16       |
|              | 618.878 | 17   |            |               | NacK12acK20me2                  | NacK8acK20me2                | NacK16acK20me2                                     |          |
|              |         |      | 42         | 26            | 14                              | 6                            | 6                                                  | 16       |
| ac1.p1       | 621.357 | 18   |            |               | NacS1phos                       | -                            | -                                                  |          |
|              |         |      | 4          | 3             | 3                               | -                            | -                                                  | 1        |
| ac2.me3      | 622.380 | 19   |            |               | -                               | -                            | -                                                  |          |
|              |         |      | 22         | 0             | -                               | -                            | -                                                  | 22       |
|              | 622.380 | 20   |            |               | NacK16acK20me3                  | NacR3meK16acK20me2           | NacK12acK20me3                                     |          |
|              |         |      | 74         | 40            | 15                              | 11                           | 7                                                  | 34       |
| ac3          | 622.372 | 21   |            |               | NacK5acK12ac                    | NacK12acK16ac                | NacK5acK16ac                                       |          |
|              |         |      | 22         | 83            | 61                              | 25                           | 9                                                  | 22       |
| ac1.me1.p1   | 624.862 | 23   |            |               | -                               | -                            | -                                                  |          |
|              |         |      | 0          | 0             | -                               | -                            | -                                                  | 0        |
| ac2.me4      | 625.885 | 24   |            |               | -                               | -                            | -                                                  |          |
|              |         |      | 0          | 0             | -                               | -                            | -                                                  | 0        |
|              | 625.885 | 25   |            |               | NacR3me2K16acK20me2             | NacR3me2K16acR19me1K20me1    | -                                                  |          |
|              |         |      | 13         | 8             | 7                               | 1                            | -                                                  | 5        |
| ac3.me1      | 625.876 | 26   |            |               | NacK12acK16acK20me1             | NacK8acK12acK20me1           | NacK5acK8acK20me1                                  |          |
|              |         |      | 73         | 38            | 24                              | 9                            | 4                                                  | 35       |
|              | 625.876 | 27   |            |               | NacK12acK16acK20me1             | NacK5acR17meK20ac            | -                                                  |          |
|              |         |      | 33         | 3             | 2                               | 1                            | -                                                  | 30       |
| ac1.me2.p1   | 628.366 | 28   |            |               | NacS1phosK20me2                 | -                            | -                                                  |          |
|              |         |      | 2          | 2             | 2                               | -                            | -                                                  | 0        |
| ac3.me2      | 629.380 | 29   |            |               | NacK8acK12acK20me2              | NacK5acR17me2K20ac           | NacK5acK8acK20me2                                  |          |
|              |         |      | 51         | 43            | 14                              | 9                            | 8                                                  | 8        |
|              | 629.380 | 30   |            |               | NacK12acK16acK20me2             | NacK8acK12acK20me2           | NacK12acK16acR19me1K20me1                          |          |
|              |         |      | 115        | 49            | 43                              | 5                            | 1                                                  | 66       |
| ac2.p1       | 631.861 | 31   |            |               | NacS1phosK16ac                  | -                            | -                                                  |          |
|              |         |      | 11         | 3             | 3                               | -                            | -                                                  | 8        |
| ac3.me3      | 632.884 | 32   |            |               | -                               | -                            | -                                                  |          |
|              |         |      | 13         | 0             | -                               | -                            | -                                                  | 13       |
|              | 632.884 | 33   |            |               | NacK8acK12acK20me3              | NacK5acK12me3K20ac           | NacK8me3K16acK20ac                                 |          |
|              |         |      | 31         | 8             | 3                               | 2                            | 2                                                  | 23       |
|              | 632.884 | 34   |            |               | NacK5me1K12acK16acK20me2        | -                            | -                                                  |          |
|              |         |      | 14         | 1             | 1                               | -                            | -                                                  | 13       |
|              | 632.884 | 35   |            |               | -                               | -                            | -                                                  |          |
|              |         |      | 3          | 0             | -                               | -                            | -                                                  | 3        |
| ac4          | 632.874 | 36   |            |               | NacK5acK8acK16ac                | NacK5acK12acK16ac            | NacK5acK8acK20ac                                   |          |
|              |         |      | 19         | 10            | 7                               | 2                            | 1                                                  | 9        |
|              | 632.875 | 37   |            |               | NacK5acK8acK12ac                | NacK8acK12acK16ac            | NacK5acK12acK16ac                                  |          |
|              |         |      | 43         | 28            | 14                              | 7                            | 6                                                  | 15       |
| ac3.me3.cit1 | 633.132 | 38   |            |               | NacK16acR17me2R19me1K20acR23cit | NacK12K16acK20me3R23cit      | -                                                  |          |
|              |         |      | 43         | 4             | 3                               | 1                            | -                                                  | 39       |
| ac4.me1      | 636.378 | 39   |            |               | NacK5acK8acK12acK20me1          | -                            | -                                                  |          |
|              |         |      | 12         | 2             | 2                               | -                            | -                                                  | 10       |
|              | 636.379 | 40   |            |               | NacK8acK12acK16acK20me1         | NacK8acK12acK16acR19me1      | -                                                  |          |
|              |         |      | 13         | 6             | 5                               | 1                            | -                                                  | 7        |
| ac2.me2.p1   | 638.869 | 41   |            |               | NacS1phosK16acK20me2            | NacS1phosK16acR17me1K20me1   | -                                                  |          |
|              |         |      | 23         | 11            | 10                              | 1                            | -                                                  | 12       |
| ac4.me2      | 639.882 | 42   |            |               | NacK5acK8acK12acK20me2          | NacK5acK8acK16me1R17me1K20ac | -                                                  |          |
|              |         |      | 23         | 5             | 3                               | 2                            | -                                                  | 18       |
|              | 639.883 | 43   |            |               | NacK8acK12acK16acK20me2         | NacK5acK8acK12acK20me2       | NacK5acK8acR17me2K20ac                             |          |
|              |         |      | 40         | 32            | 16                              | 15                           | 1                                                  | 8        |
| ac5          | 643.377 | 44   |            |               | NacK5acK8acK12acK16ac           | -                            | -                                                  |          |
|              |         |      | 16         | 14            | 14                              | -                            | -                                                  | 2        |
| ac5.me1      | 646.881 | 45   |            |               | NacK5acK8acK12acK16acK20me1     | -                            | -                                                  |          |
|              |         |      | 13         | 9             | 9                               | -                            | -                                                  | 4        |
| ac5.me2      | 650.385 | 46   |            |               | NacK5acK8acK12acK16acK20me2     | -                            | -                                                  |          |
|              |         |      | 18         | 18            | 18                              | -                            | -                                                  | 0        |
| ac5.me3      | 653.889 | 47   |            |               | -                               | -                            | -                                                  |          |
|              |         |      | 1          | 0             | -                               | -                            | -                                                  | 1        |

**Table S3 Combinatorial acetylation**

From the MASCOT results obtained for all datasets, combinatorial acetylation (K5/K8/K12/K16) was counted and best ion scores were indicated. This list was limited on common PTMs showed in Fig. 1b. This list includes chromatographically overlapped co-eluting species. Pep\_score, pep\_expect and pep\_var\_pos\_conf were all derived from MASCOT search results, each of which stands for MASCOT ion score, MASCOT peptide expect and MASCOT delta score. MASCOT peptide expect are mirrors of the MASCOT ion scores which are adjusted with length and uniqueness of the peptide to show statistical relevances of the peptide match searching for each peptide. MASCOT delta scores are derived from the difference between rank 1 ion score and rank 2 ion score, which indicate probabilities of a precise PTM localization for a single modification. When multiple rank 1 identification for one MS/MS spectrum existed, its assignment was represented with the top one on the Mascot list.

Spectral counts

|             | S1ph            | -            |     |     |      | +   |     |     | -   |     |    |
|-------------|-----------------|--------------|-----|-----|------|-----|-----|-----|-----|-----|----|
|             | R3              | me0          |     |     |      | me0 |     |     | me1 | me2 |    |
|             | K20             | me0          | me1 | me2 | me3  | me0 | me1 | me2 | me2 | me2 |    |
| acetylation | 0               | none         | 11  |     | 36   |     |     |     |     |     |    |
|             | 1               | N            | 615 | 203 | 1133 | 90  | 6   | 2   | 8   | 69  | 96 |
|             | 2               | N+K16        | 160 | 105 | 176  | 47  | 10  |     | 63  | 62  | 23 |
|             |                 | N+K12        | 95  | 75  | 113  | 34  |     |     |     | 4   |    |
|             |                 | N+K8         | 4   | 12  | 22   |     |     |     |     |     |    |
|             | 3               | N+K12+K16    | 93  | 83  | 201  | 10  |     |     |     |     |    |
|             |                 | N+K8+K12     | 13  | 31  | 74   | 7   |     |     |     |     |    |
|             |                 | N+K5+K8      | 6   | 10  | 32   |     |     |     |     |     |    |
|             |                 | N+K5+K12     | 138 |     |      |     |     |     |     |     |    |
|             |                 | N+K5+K16     | 73  |     |      |     |     |     |     |     |    |
|             | 4               | N+K8+K16     | 20  |     |      |     |     |     |     |     |    |
|             |                 | N+K8+K12+K16 | 58  | 62  | 137  |     |     |     |     |     |    |
|             |                 | N+K5+K8+K12  | 114 | 23  | 98   |     |     |     |     |     |    |
|             | 5               | N+K5+K8+K16  | 63  |     |      |     |     |     |     |     |    |
|             |                 | N+K5+K12+K16 | 54  |     |      |     |     |     |     |     |    |
| 5           | N+K5+K8+K12+K16 | 85           | 29  | 77  |      |     |     |     |     |     |    |

pep\_score

|             | S1ph | -               |        |        |        | +      |       |       | -     |       |       |
|-------------|------|-----------------|--------|--------|--------|--------|-------|-------|-------|-------|-------|
|             | R3   | me0             |        |        |        | me0    |       |       | me1   | me2   |       |
|             | K20  | me0             | me1    | me2    | me3    | me0    | me1   | me2   | me1   | me2   |       |
| acetylation | 0    | none            | 73.59  |        | 81.89  |        |       |       |       |       |       |
|             | 1    | N               | 113.37 | 103.84 | 109.33 | 101.69 | 53.25 | 47.11 | 75.83 | 79.37 | 84.43 |
|             | 2    | N+K16           | 101.56 | 99.77  | 123.16 | 93.91  | 57.42 |       | 78.92 | 79.16 | 71.85 |
|             |      | N+K12           | 109.75 | 106.51 | 105.43 | 84.85  |       |       |       | 43.1  |       |
|             |      | N+K8            | 63.77  | 69.09  | 71.88  |        |       |       |       |       |       |
|             | 3    | N+K12+K16       | 91.17  | 91.14  | 92.39  | 61.31  |       |       |       |       |       |
|             |      | N+K8+K12        | 56.63  | 63.73  | 83.38  | 50.55  |       |       |       |       |       |
|             |      | N+K5+K8         | 58.76  | 66.56  | 71.6   |        |       |       |       |       |       |
|             |      | N+K5+K12        | 99.2   |        |        |        |       |       |       |       |       |
|             |      | N+K5+K16        | 75.09  |        |        |        |       |       |       |       |       |
|             | 4    | N+K8+K16        | 79.03  |        |        |        |       |       |       |       |       |
|             |      | N+K8+K12+K16    | 81.21  | 71     | 85.75  |        |       |       |       |       |       |
|             |      | N+K5+K8+K12     | 85.44  | 53.99  | 96.27  |        |       |       |       |       |       |
|             |      | N+K5+K8+K16     | 76.16  |        |        |        |       |       |       |       |       |
|             | 5    | N+K5+K12+K16    | 85.58  |        |        |        |       |       |       |       |       |
|             |      | N+K5+K8+K12+K16 | 92.78  | 71.37  | 96.59  |        |       |       |       |       |       |

pep\_expect

|             | S1ph | -               |          |          |          | +        |          |          | -        |          |          |
|-------------|------|-----------------|----------|----------|----------|----------|----------|----------|----------|----------|----------|
|             | R3   | me0             |          |          |          | me0      |          |          | me1      | me2      |          |
|             | K20  | me0             | me1      | me2      | me3      | me0      | me1      | me2      | me2      | me2      |          |
| acetylation | 0    | none            | 4.5.E-07 |          | 7.3.E-07 |          |          |          |          |          |          |
|             | 1    | N               | 8.3.E-10 | 6.8.E-09 | 1.7.E-09 | 9.0.E-09 | 1.7.E-03 | 6.7.E-03 | 8.4.E-06 | 1.5.E-06 | 4.1.E-07 |
|             | 2    | N+K16           | 1.6.E-08 | 2.2.E-08 | 9.6.E-11 | 7.2.E-08 | 6.9.E-04 |          | 4.5.E-06 | 2.3.E-06 | 1.0.E-05 |
|             |      | N+K12           | 2.3.E-09 | 4.8.E-09 | 5.4.E-09 | 5.9.E-07 |          |          |          | 8.5.E-03 |          |
|             |      | N+K8            | 9.0.E-05 | 2.5.E-05 | 1.2.E-05 |          |          |          |          |          |          |
|             | 3    | N+K12+K16       | 1.8.E-07 | 1.7.E-07 | 1.2.E-07 | 1.5.E-04 |          |          |          |          |          |
|             |      | N+K8+K12        | 2.3.E-04 | 9.3.E-05 | 9.2.E-07 | 1.8.E-03 |          |          |          |          |          |
|             |      | N+K5+K8         | 3.1.E-04 | 4.8.E-05 | 1.4.E-05 |          |          |          |          |          |          |
|             |      | N+K5+K12        | 3.0.E-08 |          |          |          |          |          |          |          |          |
|             |      | N+K5+K16        | 7.4.E-06 |          |          |          |          |          |          |          |          |
|             | 4    | N+K8+K16        | 3.1.E-06 |          |          |          |          |          |          |          |          |
|             |      | N+K8+K12+K16    | 2.1.E-06 | 2.1.E-05 | 6.7.E-07 |          |          |          |          |          |          |
|             |      | N+K5+K8+K12     | 4.3.E-07 | 2.1.E-04 | 6.2.E-08 |          |          |          |          |          |          |
|             |      | N+K5+K8+K16     | 6.7.E-06 |          |          |          |          |          |          |          |          |
|             | 5    | N+K5+K12+K16    | 7.8.E-07 |          |          |          |          |          |          |          |          |
|             |      | N+K5+K8+K12+K16 | 1.7.E-07 | 7.1.E-06 | 6.6.E-08 |          |          |          |          |          |          |

pep\_var\_pos\_conf

|             | S1ph | -               |        |        |        | +      |        |       | -      |        |        |
|-------------|------|-----------------|--------|--------|--------|--------|--------|-------|--------|--------|--------|
|             | R3   | me0             |        |        |        | me0    |        |       | me1    | me2    |        |
|             | K20  | me0             | me1    | me2    | me3    | me0    | me1    | me2   | me2    | me2    |        |
| acetylation | 0    | none            |        |        | 0.9391 |        |        |       |        |        |        |
|             | 1    | N               | 0.9998 | 0.9809 | 0.9575 | 0.9927 | 0.9946 | 0.859 | 0.8807 | 0.5927 | 0.838  |
|             | 2    | N+K16           | 0.9983 | 0.9346 | 0.918  | 0.6448 | 0.9385 |       | 0.918  | 0.1328 | 0.5549 |
|             |      | N+K12           | 0.9993 | 0.8859 | 0.8843 | 0.5895 |        |       |        | 0.031  |        |
|             |      | N+K8            | 0.6548 | 0.6388 | 0.5887 |        |        |       |        |        |        |
|             | 3    | N+K12+K16       | 0.9977 | 0.8755 | 0.9369 | 0.4555 |        |       |        |        |        |
|             |      | N+K8+K12        | 0.6044 | 0.7657 | 0.8208 | 0.2398 |        |       |        |        |        |
|             |      | N+K5+K8         | 0.7925 | 0.8761 | 0.6642 |        |        |       |        |        |        |
|             |      | N+K5+K12        | 0.9994 |        |        |        |        |       |        |        |        |
|             |      | N+K5+K16        | 0.9942 |        |        |        |        |       |        |        |        |
|             | 4    | N+K8+K16        | 0.9770 |        |        |        |        |       |        |        |        |
|             |      | N+K8+K12+K16    | 0.9916 | 0.795  | 0.8443 |        |        |       |        |        |        |
|             |      | N+K5+K8+K12     | 0.9996 | 0.9341 | 0.9656 |        |        |       |        |        |        |
|             |      | N+K5+K8+K16     | 0.9980 |        |        |        |        |       |        |        |        |
|             | 5    | N+K5+K12+K16    | 0.9954 |        |        |        |        |       |        |        |        |
|             |      | N+K5+K8+K12+K16 | 0.9998 | 0.9037 | 0.9658 |        |        |       |        |        |        |

### Table S4 Identified 14-3-3 derived peptides list

All the peptides assigned as 14-3-3 protein in the in-gel digestion experiment (Fig. 5) are shown.

| 1433E_HUMAN                |                     | 170/255 amino acids (67% coverage) |                                              |          |             |        |          |           |                      |       |      |                                                 |  |
|----------------------------|---------------------|------------------------------------|----------------------------------------------|----------|-------------|--------|----------|-----------|----------------------|-------|------|-------------------------------------------------|--|
| Sequence                   | Peptide Probability | Mascot Ion score                   | Modifications                                | Observed | Actual Mass | Charge | Delta Da | Delta PPM | Retention Time (sec) | Start | Stop | Other Proteins                                  |  |
| C)mDDREDLVYQAK(L)          | 100%                | 38.6                               | Oxidation (+16), Acetyl (+42)                | 770.852  | 1539.690    | 2      | 0.002    | 1.5       | 643                  | 1     | 12   |                                                 |  |
| C)mDDREDLVYQAK(L)          | 100%                | 36.4                               | Oxidation (+16), Oxidation (+16)             | 770.852  | 1539.690    | 2      | 0.002    | 1.4       | 641                  | 1     | 12   |                                                 |  |
| (K)LAEAQERYDENVESmKK(V)    | 100%                | 48.8                               | Oxidation (+16), Oxidation (+16)             | 696.991  | 2087.952    | 3      | 0.001    | 0.5       | 529                  | 13    | 29   |                                                 |  |
| (K)LAEAQERYDENVESmKK(V)    | 99%                 | 26.3                               | Oxidation (+16), Oxidation (+16)             | 696.991  | 2087.952    | 3      | 0.001    | 0.5       | 531                  | 13    | 29   |                                                 |  |
| (R)YDEmVESmKK(V)           | 97%                 | 25.5                               | Oxidation (+16), Oxidation (+16)             | 646.281  | 1290.548    | 2      | 0.001    | 0.5       | 387                  | 20    | 29   |                                                 |  |
| (R)YDEmVESmKK(V)           | 97%                 | 26.1                               | Oxidation (+16), Oxidation (+16)             | 646.281  | 1290.548    | 2      | 0.001    | 0.6       | 386                  | 20    | 29   |                                                 |  |
| (K)KVAGmDVELTVEER(N)       | 100%                | 34.1                               | Oxidation (+16)                              | 531.271  | 1590.792    | 3      | 0.000    | -0.1      | 620                  | 29    | 42   |                                                 |  |
| (K)KVAGmDVELTVEER(N)       | 100%                | 93.5                               | Oxidation (+16)                              | 732.357  | 1462.699    | 2      | 0.001    | 0.9       | 681                  | 30    | 42   |                                                 |  |
| (K)KVAGmDVELTVEER(N)       | 100%                | 89.7                               | Oxidation (+16)                              | 732.357  | 1462.699    | 2      | 0.001    | 0.8       | 683                  | 30    | 42   |                                                 |  |
| (R)NLLSVAYK(N)             | 99%                 | 54.4                               |                                              | 454.266  | 906.518     | 2      | 0.000    | 0.1       | 770                  | 43    | 50   | 1433Z_HUMAN,1433G_HUMAN,1433S_HUMAN,1433F_HUMAN |  |
| (R)NLLSVAYK(N)             | 99%                 | 53.0                               |                                              | 454.266  | 906.518     | 2      | 0.000    | 0.2       | 769                  | 43    | 50   | 1433Z_HUMAN,1433G_HUMAN,1433S_HUMAN,1433F_HUMAN |  |
| (R)VISSIEQK(E)             | 99%                 | 62.5                               |                                              | 459.269  | 916.523     | 2      | 0.000    | -0.2      | 541                  | 62    | 69   |                                                 |  |
| (R)VISSIEQK(E)             | 99%                 | 40.8                               |                                              | 459.269  | 916.523     | 2      | 0.000    | -0.2      | 543                  | 62    | 69   |                                                 |  |
| (R)VISSIEQKEENKGGEDK(L)(M) | 100%                | 45.5                               |                                              | 715.719  | 2144.135    | 3      | 0.002    | 0.8       | 492                  | 62    | 80   |                                                 |  |
| (R)VISSIEQKEENKGGEDK(L)(M) | 100%                | 36.9                               |                                              | 715.719  | 2144.135    | 3      | 0.002    | 1.1       | 490                  | 62    | 80   |                                                 |  |
| (K)EENKGGEDK(L)(M)         | 100%                | 50.8                               |                                              | 623.818  | 1245.621    | 2      | 0.000    | 0.3       | 331                  | 70    | 80   |                                                 |  |
| (R)QmVETELK(L)             | 99%                 | 56.0                               | Oxidation (+16)                              | 497.250  | 992.485     | 2      | 0.000    | -0.5      | 513                  | 87    | 94   |                                                 |  |
| (R)QmVETELK(L)             | 99%                 | 55.8                               | Oxidation (+16)                              | 497.250  | 992.485     | 2      | 0.000    | -0.2      | 514                  | 87    | 94   |                                                 |  |
| (K)LIc-DILDVLD(K)(H)       | 100%                | 57.2                               | Carbamidomethyl (+57), Carbamidomethyl (+57) | 728.876  | 1475.738    | 2      | 0.001    | 0.7       | 1043                 | 95    | 106  |                                                 |  |
| (K)HLIPAAINTGESK(V)        | 100%                | 89.0                               |                                              | 619.331  | 1236.647    | 2      | 0.001    | 0.6       | 485                  | 107   | 118  |                                                 |  |
| (K)HLIPAAINTGESK(V)        | 100%                | 58.9                               |                                              | 619.331  | 1236.647    | 2      | 0.001    | 0.7       | 487                  | 107   | 118  |                                                 |  |
| (R)YLAEFATGNDK(K)          | 100%                | 64.4                               |                                              | 628.799  | 1255.584    | 2      | 0.001    | 0.7       | 719                  | 131   | 141  |                                                 |  |
| (R)YLAEFATGNDK(K)          | 100%                | 61.9                               |                                              | 628.799  | 1255.584    | 2      | 0.001    | 0.6       | 717                  | 131   | 141  |                                                 |  |
| (R)YLAEFATGNDK(K)          | 100%                | 45.4                               |                                              | 462.233  | 933.678     | 3      | 0.000    | -0.2      | 633                  | 131   | 142  |                                                 |  |
| (R)YLAEFATGNDK(K)          | 100%                | 40.3                               |                                              | 462.233  | 933.678     | 3      | 0.000    | -0.1      | 634                  | 131   | 142  |                                                 |  |
| (K)EAAENSLVAYK(A)          | 100%                | 61.9                               |                                              | 597.804  | 1193.593    | 2      | 0.001    | 0.7       | 631                  | 143   | 153  |                                                 |  |
| (K)EAAENSLVAYK(A)          | 100%                | 59.7                               |                                              | 597.804  | 1193.593    | 2      | 0.001    | 0.5       | 634                  | 143   | 153  |                                                 |  |
| (K)AASDIaImTELPPTHPIR(L)   | 100%                | 63.4                               | Oxidation (+16)                              | 612.649  | 1834.926    | 3      | 0.001    | 0.6       | 647                  | 154   | 170  |                                                 |  |
| (K)AASDIaImTELPPTHPIR(L)   | 100%                | 62.8                               | Oxidation (+16)                              | 612.649  | 1834.926    | 3      | 0.001    | 0.6       | 645                  | 154   | 170  |                                                 |  |
| (K)AASDIaImTELPPTHPIR(L)   | 100%                | 60.8                               | Oxidation (+16)                              | 612.649  | 1834.926    | 3      | 0.001    | 0.4       | 715                  | 154   | 170  |                                                 |  |
| (K)AAFDDAIAELDTLSEESYK(D)  | 100%                | 114.1                              |                                              | 1044.489 | 2086.960    | 2      | 0.004    | 1.9       | 1104                 | 197   | 215  |                                                 |  |
| (K)AAFDDAIAELDTLSEESYK(D)  | 100%                | 67.8                               |                                              | 696.661  | 2086.960    | 3      | 0.002    | 0.9       | 1104                 | 197   | 215  |                                                 |  |
| (K)AAFDDAIAELDTLSEESYK(D)  | 100%                | 85.8                               |                                              | 1044.488 | 2086.961    | 2      | 0.003    | 1.4       | 1102                 | 197   | 215  |                                                 |  |
| (K)AAFDDAIAELDTLSEESYK(D)  | 100%                | 63.6                               |                                              | 696.661  | 2086.960    | 3      | 0.001    | 0.6       | 1102                 | 197   | 215  |                                                 |  |
| (K)DSTLimQLLR(D)           | 100%                | 70.5                               | Oxidation (+16)                              | 603.332  | 1204.649    | 2      | 0.000    | 0.2       | 1023                 | 218   | 225  | 1433Z_HUMAN,1433G_HUMAN,1433S_HUMAN,1433F_HUMAN |  |
| (K)DSTLimQLLR(D)           | 100%                | 56.1                               | Oxidation (+16)                              | 603.332  | 1204.649    | 2      | 0.000    | 0.1       | 1028                 | 218   | 225  | 1433Z_HUMAN,1433G_HUMAN,1433S_HUMAN,1433F_HUMAN |  |

| 1433F_HUMAN          |                     | 78/246 amino acids (32% coverage) |                                  |          |             |        |          |           |                      |       |      |                                                 |  |
|----------------------|---------------------|-----------------------------------|----------------------------------|----------|-------------|--------|----------|-----------|----------------------|-------|------|-------------------------------------------------|--|
| Sequence             | Peptide Probability | Mascot Ion score                  | Modifications                    | Observed | Actual Mass | Charge | Delta Da | Delta PPM | Retention Time (sec) | Start | Stop | Other Proteins                                  |  |
| (M)gDREQLQ(R)(A)     | 100%                | 32.9                              | Acetyl (+42)                     | 578.807  | 1155.600    | 2      | 0.000    | 0.1       | 605                  | 2     | 10   |                                                 |  |
| (R)YDDmAAAmK(N)      | 100%                | 48.3                              | Oxidation (+16), Oxidation (+16) | 532.207  | 1062.400    | 2      | 0.000    | -0.4      | 368                  | 20    | 28   |                                                 |  |
| (K)AVTELNEPLSNEDR(N) | 100%                | 87.9                              |                                  | 793.888  | 1585.761    | 2      | 0.003    | 1.7       | 662                  | 29    | 42   |                                                 |  |
| (K)AVTELNEPLSNEDR(N) | 100%                | 81.7                              |                                  | 793.888  | 1585.761    | 2      | 0.002    | 1.4       | 665                  | 29    | 42   |                                                 |  |
| (R)NLLSVAYK(N)       | 99%                 | 54.5                              |                                  | 454.266  | 906.518     | 2      | 0.000    | 0.0       | 768                  | 43    | 50   | 1433Z_HUMAN,1433G_HUMAN,1433S_HUMAN,1433E_HUMAN |  |
| (R)NLLSVAYK(N)       | 99%                 | 52.0                              |                                  | 454.266  | 906.518     | 2      | 0.000    | 0.0       | 769                  | 43    | 50   | 1433Z_HUMAN,1433G_HUMAN,1433S_HUMAN,1433E_HUMAN |  |
| (R)VISSIEQK(T)       | 99%                 | 56.1                              |                                  | 452.261  | 902.507     | 2      | 0.000    | -0.2      | 505                  | 62    | 69   | 1433G_HUMAN,1433S_HUMAN                         |  |
| (R)VISSIEQK(T)       | 99%                 | 55.3                              |                                  | 452.261  | 902.507     | 2      | 0.000    | -0.2      | 503                  | 62    | 69   | 1433G_HUMAN,1433S_HUMAN                         |  |
| (R)YLAEVAASGEK(K)    | 100%                | 70.3                              |                                  | 533.774  | 1065.534    | 2      | 0.000    | -0.3      | 579                  | 133   | 142  |                                                 |  |
| (R)YLAEVAASGEK(K)    | 100%                | 47.4                              |                                  | 533.775  | 1065.534    | 2      | 0.000    | 0.1       | 581                  | 133   | 142  |                                                 |  |
| (K)EQmOPTPHIR(L)     | 95%                 | 26.2                              | Oxidation (+16)                  | 626.809  | 1251.603    | 2      | 0.000    | 0.1       | 390                  | 163   | 172  |                                                 |  |
| (K)DSTLimQLLR(D)     | 100%                | 70.7                              | Oxidation (+16)                  | 603.332  | 1204.649    | 2      | 0.000    | 0.1       | 1038                 | 218   | 227  | 1433Z_HUMAN,1433G_HUMAN,1433S_HUMAN,1433E_HUMAN |  |
| (K)DSTLimQLLR(D)     | 100%                | 66.3                              | Oxidation (+16)                  | 603.332  | 1204.649    | 2      | 0.000    | 0.1       | 1026                 | 218   | 227  | 1433Z_HUMAN,1433G_HUMAN,1433S_HUMAN,1433E_HUMAN |  |
| (K)DSTLimQLLR(D)     | 100%                | 60.9                              | Oxidation (+16)                  | 603.332  | 1204.649    | 2      | 0.000    | 0.1       | 1024                 | 218   | 227  | 1433Z_HUMAN,1433G_HUMAN,1433S_HUMAN,1433E_HUMAN |  |
| (K)DSTLimQLLR(D)     | 100%                | 56.1                              | Oxidation (+16)                  | 603.332  | 1204.649    | 2      | 0.000    | 0.0       | 1037                 | 218   | 227  | 1433Z_HUMAN,1433G_HUMAN,1433S_HUMAN,1433E_HUMAN |  |

| 1433G_HUMAN           |                     | 98/247 amino acids (40% coverage) |                                  |          |             |        |          |           |                      |       |      |                                                 |  |
|-----------------------|---------------------|-----------------------------------|----------------------------------|----------|-------------|--------|----------|-----------|----------------------|-------|------|-------------------------------------------------|--|
| Sequence              | Peptide Probability | Mascot Ion score                  | Modifications                    | Observed | Actual Mass | Charge | Delta Da | Delta PPM | Retention Time (sec) | Start | Stop | Other Proteins                                  |  |
| (M)gDREQLVQ(K)(A)     | 100%                | 43.8                              | Acetyl (+42)                     | 578.820  | 1155.625    | 2      | 0.000    | 0.4       | 589                  | 2     | 10   |                                                 |  |
| (M)gDREQLVQ(K)(A)     | 99%                 | 30.7                              | Acetyl (+42)                     | 578.820  | 1155.625    | 2      | 0.000    | 0.1       | 595                  | 2     | 10   |                                                 |  |
| (R)YDDmAAAmK(N)       | 100%                | 51.1                              | Oxidation (+16), Oxidation (+16) | 524.209  | 1048.404    | 2      | -0.001   | -0.7      | 383                  | 20    | 28   |                                                 |  |
| (R)YDDmAAAmK(N)       | 100%                | 51.0                              | Oxidation (+16), Oxidation (+16) | 524.209  | 1048.404    | 2      | -0.001   | -0.8      | 384                  | 20    | 28   |                                                 |  |
| (K)NVTTELNEPLSNEER(N) | 100%                | 93.2                              |                                  | 822.398  | 1642.783    | 2      | 0.003    | 1.6       | 673                  | 29    | 42   |                                                 |  |
| (K)NVTTELNEPLSNEER(N) | 100%                | 92.1                              |                                  | 822.398  | 1642.782    | 2      | 0.002    | 1.3       | 671                  | 29    | 42   |                                                 |  |
| (R)NLLSVAYK(N)        | 99%                 | 54.5                              |                                  | 454.266  | 906.518     | 2      | 0.000    | 0.0       | 768                  | 43    | 50   | 1433Z_HUMAN,1433S_HUMAN,1433E_HUMAN,1433F_HUMAN |  |
| (R)NLLSVAYK(N)        | 99%                 | 52.0                              |                                  | 454.266  | 906.518     | 2      | 0.000    | 0.0       | 769                  | 43    | 50   | 1433Z_HUMAN,1433S_HUMAN,1433E_HUMAN,1433F_HUMAN |  |
| (R)VISSIEQK(T)        | 99%                 | 56.1                              |                                  | 452.261  | 902.507     | 2      | 0.000    | -0.2      | 505                  | 62    | 69   | 1433S_HUMAN,1433F_HUMAN                         |  |
| (R)VISSIEQK(T)        | 99%                 | 55.3                              |                                  | 452.261  | 902.507     | 2      | 0.000    | -0.2      | 503                  | 62    | 69   | 1433S_HUMAN,1433F_HUMAN                         |  |
| (R)YLAEVATGEK(R)      | 100%                | 74.5                              |                                  | 540.782  | 1079.550    | 2      | 0.000    | -0.3      | 596                  | 133   | 142  |                                                 |  |
| (R)YLAEVATGEK(R)      | 100%                | 69.6                              |                                  | 540.782  | 1079.550    | 2      | 0.000    | -0.4      | 599                  | 133   | 142  |                                                 |  |
| (K)RATVVSSEK(A)       | 100%                | 38.6                              |                                  | 553.296  | 1104.577    | 2      | 0.000    | -0.3      | 365                  | 143   | 152  |                                                 |  |
| (K)RATVVSSEK(A)       | 97%                 | 27.3                              |                                  | 553.296  | 1104.577    | 2      | 0.000    | -0.1      | 368                  | 143   | 152  |                                                 |  |
| (R)ATVVSSEK(A)        | 100%                | 65.0                              |                                  | 475.245  | 948.476     | 2      | 0.000    | -0.3      | 401                  | 144   | 152  |                                                 |  |
| (R)ATVVSSEK(A)        | 100%                | 61.2                              |                                  | 475.245  | 948.476     | 2      | 0.000    | -0.3      | 398                  | 144   | 152  |                                                 |  |
| (K)AYSEAHEISK(E)      | 100%                | 66.8                              |                                  | 567.775  | 1133.535    | 2      | 0.000    | 0.0       | 426                  | 153   | 162  |                                                 |  |
| (K)AYSEAHEISK(E)      | 100%                | 59.9                              |                                  | 567.775  | 1133.535    | 2      | 0.000    | -0.1      | 429                  | 153   | 162  |                                                 |  |
| (K)EHmOPTPHIR(L)      | 100%                | 32.1                              | Oxidation (+16)                  | 631.309  | 1260.604    | 2      | 0.000    | 0.3       | 351                  | 163   | 172  |                                                 |  |
| (K)DSTLimQLLR(D)      | 100%                | 70.7                              | Oxidation (+16)                  | 603.332  | 1204.649    | 2      | 0.000    | 0.1       | 1038                 | 218   | 227  | 1433Z_HUMAN,1433S_HUMAN,1433E_HUMAN,1433F_HUMAN |  |
| (K)DSTLimQLLR(D)      | 100%                | 66.3                              | Oxidation (+16)                  | 603.332  | 1204.649    | 2      | 0.000    | 0.1       | 1026                 | 218   | 227  | 1433Z_HUMAN,1433S_HUMAN,1433E_HUMAN,1433F_HUMAN |  |
| (K)DSTLimQLLR(D)      | 100%                | 60.9                              | Oxidation (+16)                  | 603.332  | 1204.649    | 2      | 0.000    | 0.1       | 1024                 | 218   | 227  | 1433Z_HUMAN,1433S_HUMAN,1433E_HUMAN,1433F_HUMAN |  |
| (K)DSTLimQLLR(D)      | 100%                | 56.1                              | Oxidation (+16)                  | 603.332  | 1204.649    | 2      | 0.000    | 0.0       | 1037                 | 218   | 227  | 1433Z_HUMAN,1433S_HUMAN,1433E_HUMAN,1433F_HUMAN |  |

| 14335_HUMAN              |                     | 122/248 amino acids (49% coverage) |                                  |          |             |        |          |           |                      |       |      |                                                 |
|--------------------------|---------------------|------------------------------------|----------------------------------|----------|-------------|--------|----------|-----------|----------------------|-------|------|-------------------------------------------------|
| Sequence                 | Peptide Probability | Mascot Delta Ion Score             | Modifications                    | Observed | Actual Mass | Charge | Delta Da | Delta PPM | Retention Time (sec) | Start | Stop | Other Proteins                                  |
| (K)LAEQAEARYEDmAAFmK(G)  | 100%                | 43.8                               | Oxidation (+16), Oxidation (+16) | 645.626  | 1933.857    | 3      | 0.001    | 0.7       | 622                  | 12    | 27   |                                                 |
| (R)YEDmAAFmK(G)          | 100%                | 54.1                               | Oxidation (+16), Oxidation (+16) | 569.233  | 1136.451    | 2      | -0.001   | -1.0      | 547                  | 19    | 27   |                                                 |
| (K)GAVEKGEELScEER(N)     | 100%                | 48.3                               | Carbamidomethyl (+57)            | 531.579  | 1591.715    | 3      | 0.000    | -0.2      | 503                  | 28    | 41   |                                                 |
| (K)GAVEKGEELScEER(N)     | 100%                | 57.2                               | Carbamidomethyl (+57)            | 796.866  | 1591.717    | 2      | 0.002    | 1.1       | 503                  | 28    | 41   |                                                 |
| (K)GAVEKGEELScEER(N)     | 100%                | 28.8                               | Carbamidomethyl (+57)            | 531.579  | 1591.715    | 3      | 0.000    | -0.2      | 505                  | 28    | 41   |                                                 |
| (R)NLLSVAYK(N)           | 99%                 | 54.4                               |                                  | 454.266  | 906.518     | 2      | 0.000    | 0.1       | 770                  | 42    | 49   | 1433Z_HUMAN,1433G_HUMAN,1433E_HUMAN,1433F_HUMAN |
| (R)NLLSVAYK(N)           | 99%                 | 53.0                               |                                  | 454.266  | 906.518     | 2      | 0.000    | 0.2       | 769                  | 42    | 49   | 1433Z_HUMAN,1433G_HUMAN,1433E_HUMAN,1433F_HUMAN |
| (R)VLSSIEQK(S)           | 99%                 | 61.9                               |                                  | 452.261  | 902.507     | 2      | 0.000    | -0.2      | 524                  | 61    | 68   | 1433G_HUMAN,1433F_HUMAN                         |
| (R)VLSSIEQK(S)           | 99%                 | 56.9                               |                                  | 452.261  | 902.507     | 2      | 0.000    | -0.1      | 522                  | 61    | 68   | 1433G_HUMAN,1433F_HUMAN                         |
| (R)VLSSIEQK(S)           | 99%                 | 48.4                               |                                  | 452.261  | 902.507     | 2      | 0.000    | -0.2      | 505                  | 61    | 68   | 1433G_HUMAN,1433F_HUMAN                         |
| (R)VLSSIEQK(S)           | 99%                 | 42.3                               |                                  | 452.261  | 902.507     | 2      | 0.000    | -0.3      | 507                  | 61    | 68   | 1433G_HUMAN,1433F_HUMAN                         |
| (K)SNEEGSEKGPVEPR(E)     | 100%                | 61.7                               |                                  | 516.237  | 1545.691    | 3      | 0.000    | -0.2      | 403                  | 69    | 82   |                                                 |
| (K)SNEEGSEKGPVEPR(E)     | 100%                | 77.1                               |                                  | 773.854  | 1545.693    | 2      | 0.002    | 1.6       | 406                  | 69    | 82   |                                                 |
| (K)SNEEGSEKGPVEPR(E)     | 100%                | 47.3                               |                                  | 516.237  | 1545.690    | 3      | 0.000    | -0.3      | 401                  | 69    | 82   |                                                 |
| (K)SNEEGSEKGPVEPR(E)     | 100%                | 58.6                               |                                  | 773.854  | 1545.693    | 2      | 0.002    | 1.2       | 404                  | 69    | 82   |                                                 |
| (R)YLAEVATGDDK(K)        | 100%                | 87.2                               |                                  | 591.288  | 1180.562    | 2      | 0.000    | 0.2       | 601                  | 130   | 140  |                                                 |
| (R)YLAEVATGDDK(K)        | 100%                | 79.1                               |                                  | 591.288  | 1180.562    | 2      | 0.000    | 0.3       | 599                  | 130   | 140  |                                                 |
| (R)YLAEVATGDDK(K)        | 100%                | 59.5                               |                                  | 489.260  | 1464.757    | 3      | -0.001   | -0.4      | 485                  | 130   | 142  |                                                 |
| (R)YLAEVATGDDK(K)        | 100%                | 49.2                               |                                  | 489.260  | 1464.757    | 3      | -0.001   | -0.4      | 487                  | 130   | 142  |                                                 |
| (R)SAYQEAmDISK(K)        | 100%                | 56.9                               | Oxidation (+16)                  | 629.785  | 1257.555    | 2      | 0.000    | -0.1      | 595                  | 149   | 159  |                                                 |
| (K)EmPPTNPIR(L)          | 100%                | 34.9                               | Oxidation (+16)                  | 535.768  | 1069.522    | 2      | -0.001   | -0.7      | 527                  | 161   | 169  |                                                 |
| (K)EmPPTNPIR(L)          | 99%                 | 32.5                               | Oxidation (+16)                  | 535.768  | 1069.522    | 2      | -0.001   | -0.7      | 529                  | 161   | 169  |                                                 |
| (K)TTFDAmADLHLSSEDSYK(D) | 100%                | 38.5                               | Oxidation (+16)                  | 730.657  | 2188.949    | 3      | 0.002    | 0.8       | 852                  | 196   | 214  |                                                 |
| (K)DSTLmQLLR(D)          | 100%                | 70.5                               | Oxidation (+16)                  | 603.332  | 1204.649    | 2      | 0.000    | 0.2       | 1023                 | 215   | 224  | 1433Z_HUMAN,1433G_HUMAN,1433E_HUMAN,1433F_HUMAN |
| (K)DSTLmQLLR(D)          | 100%                | 56.1                               | Oxidation (+16)                  | 603.332  | 1204.649    | 2      | 0.000    | 0.1       | 1028                 | 215   | 224  | 1433Z_HUMAN,1433G_HUMAN,1433E_HUMAN,1433F_HUMAN |

| 1433Z_HUMAN             |                     | 102/245 amino acids (42% coverage) |                                                         |          |             |        |          |           |                      |       |      |                                                 |
|-------------------------|---------------------|------------------------------------|---------------------------------------------------------|----------|-------------|--------|----------|-----------|----------------------|-------|------|-------------------------------------------------|
| Sequence                | Peptide Probability | Mascot Delta Ion Score             | Modifications                                           | Observed | Actual Mass | Charge | Delta Da | Delta PPM | Retention Time (sec) | Start | Stop | Other Proteins                                  |
| (L)MDKNELVGK(A)         | 100%                | 50.5                               | Oxidation (+16), Acetyl (+42)                           | 581.793  | 1161.571    | 2      | 0.000    | 0.3       | 486                  | 1     | 9    |                                                 |
| (L)MDKNELVGK(A)         | 100%                | 44.0                               | Oxidation (+16), Acetyl (+42)                           | 581.793  | 1161.571    | 2      | 0.000    | 0.3       | 469                  | 1     | 9    |                                                 |
| (R)YDmAAcmK(S)          | 100%                | 50.1                               | Oxidation (+16), Carbamidomethyl (+57), Oxidation (+16) | 568.707  | 1135.399    | 2      | 0.000    | 0.0       | 382                  | 19    | 27   |                                                 |
| (R)YDmAAcmK(S)          | 100%                | 47.0                               | Oxidation (+16), Carbamidomethyl (+57), Oxidation (+16) | 568.706  | 1135.398    | 2      | 0.000    | -0.3      | 390                  | 19    | 27   |                                                 |
| (K)SVTEQGAELSNVEER(N)   | 100%                | 107.2                              |                                                         | 774.861  | 1547.708    | 2      | 0.001    | 0.9       | 542                  | 28    | 41   |                                                 |
| (K)SVTEQGAELSNVEER(N)   | 100%                | 103.3                              |                                                         | 774.861  | 1547.708    | 2      | 0.001    | 0.7       | 544                  | 28    | 41   |                                                 |
| (K)SVTEQGAELSNVEER(N)   | 100%                | 65.6                               |                                                         | 516.909  | 1477.706    | 3      | 0.000    | 0.0       | 542                  | 28    | 41   |                                                 |
| (R)NLLSVAYK(N)          | 99%                 | 54.5                               |                                                         | 454.266  | 906.518     | 2      | 0.000    | 0.0       | 768                  | 42    | 49   | 1433G_HUMAN,1433S_HUMAN,1433E_HUMAN,1433F_HUMAN |
| (R)NLLSVAYK(N)          | 99%                 | 52.0                               |                                                         | 454.266  | 906.518     | 2      | 0.000    | 0.0       | 769                  | 42    | 49   | 1433G_HUMAN,1433S_HUMAN,1433E_HUMAN,1433F_HUMAN |
| (K)FLIPNASOAEK(V)       | 100%                | 66.2                               |                                                         | 652.846  | 1303.678    | 2      | 0.001    | 0.7       | 742                  | 104   | 115  |                                                 |
| (K)FLIPNASOAEK(V)       | 100%                | 55.7                               |                                                         | 652.846  | 1303.678    | 2      | 0.001    | 0.6       | 739                  | 104   | 115  |                                                 |
| (R)YLAEVAAGDDK(K)       | 100%                | 58.8                               |                                                         | 576.283  | 1150.551    | 2      | 0.000    | 0.1       | 601                  | 128   | 138  |                                                 |
| (R)YLAEVAAGDDK(K)       | 100%                | 59.8                               |                                                         | 427.223  | 1278.646    | 3      | 0.000    | 0.2       | 525                  | 128   | 139  |                                                 |
| (R)YLAEVAAGDDK(K)       | 100%                | 56.5                               |                                                         | 427.223  | 1278.646    | 3      | 0.001    | 0.4       | 527                  | 128   | 139  |                                                 |
| (R)YLAEVAAGDDK(K)       | 100%                | 60.6                               |                                                         | 640.330  | 1278.646    | 2      | 0.000    | 0.3       | 525                  | 128   | 139  |                                                 |
| (R)YLAEVAAGDDK(K)       | 100%                | 56.8                               |                                                         | 640.330  | 1278.646    | 2      | 0.000    | 0.2       | 527                  | 128   | 139  |                                                 |
| (K)GIVDOSQOAYGEAFESK(K) | 100%                | 129.2                              |                                                         | 1020.989 | 2039.983    | 2      | 0.003    | 1.6       | 886                  | 140   | 157  |                                                 |
| (K)GIVDOSQOAYGEAFESK(K) | 100%                | 112.6                              |                                                         | 1020.989 | 2039.983    | 2      | 0.003    | 1.5       | 884                  | 140   | 157  |                                                 |
| (K)GIVDOSQOAYGEAFESK(K) | 100%                | 78.1                               |                                                         | 681.001  | 2039.982    | 3      | 0.002    | 1.1       | 886                  | 140   | 157  |                                                 |
| (K)GIVDOSQOAYGEAFESK(K) | 100%                | 52.0                               |                                                         | 681.001  | 2039.982    | 3      | 0.002    | 0.8       | 889                  | 140   | 157  |                                                 |
| (K)EmQPTHPIR(L)         | 99%                 | 30.4                               | Oxidation (+16)                                         | 626.827  | 1251.640    | 2      | 0.000    | 0.2       | 353                  | 158   | 167  |                                                 |
| (K)EmQPTHPIR(L)         | 100%                | 53.3                               | Oxidation (+16)                                         | 562.779  | 1123.544    | 2      | 0.000    | -0.3      | 387                  | 159   | 167  |                                                 |
| (K)EmQPTHPIR(L)         | 100%                | 52.5                               | Oxidation (+16)                                         | 562.779  | 1123.544    | 2      | 0.000    | -0.3      | 389                  | 159   | 167  |                                                 |
| (K)DSTLmQLLR(D)         | 100%                | 70.7                               | Oxidation (+16)                                         | 603.332  | 1204.649    | 2      | 0.000    | 0.1       | 1038                 | 213   | 222  | 1433G_HUMAN,1433S_HUMAN,1433E_HUMAN,1433F_HUMAN |
| (K)DSTLmQLLR(D)         | 100%                | 66.3                               | Oxidation (+16)                                         | 603.332  | 1204.649    | 2      | 0.000    | 0.1       | 1026                 | 213   | 222  | 1433G_HUMAN,1433S_HUMAN,1433E_HUMAN,1433F_HUMAN |
| (K)DSTLmQLLR(D)         | 100%                | 60.9                               | Oxidation (+16)                                         | 603.332  | 1204.649    | 2      | 0.000    | 0.1       | 1024                 | 213   | 222  | 1433G_HUMAN,1433S_HUMAN,1433E_HUMAN,1433F_HUMAN |
| (K)DSTLmQLLR(D)         | 100%                | 56.1                               | Oxidation (+16)                                         | 603.332  | 1204.649    | 2      | 0.000    | 0.0       | 1037                 | 213   | 222  | 1433G_HUMAN,1433S_HUMAN,1433E_HUMAN,1433F_HUMAN |
